# Supplementary material for: Organic matter and sediment properties determine in-lake variability of sediment CO 2 and CH 4 production and emissions of a small and shallow lake
Source: Copernicus journal article supplement (doi:10.5194/bg-2019-284), 2019-08-29
Supplement: Supplementary file 1 [file bg-2019-284-supplement.zip]

## Supporting Information

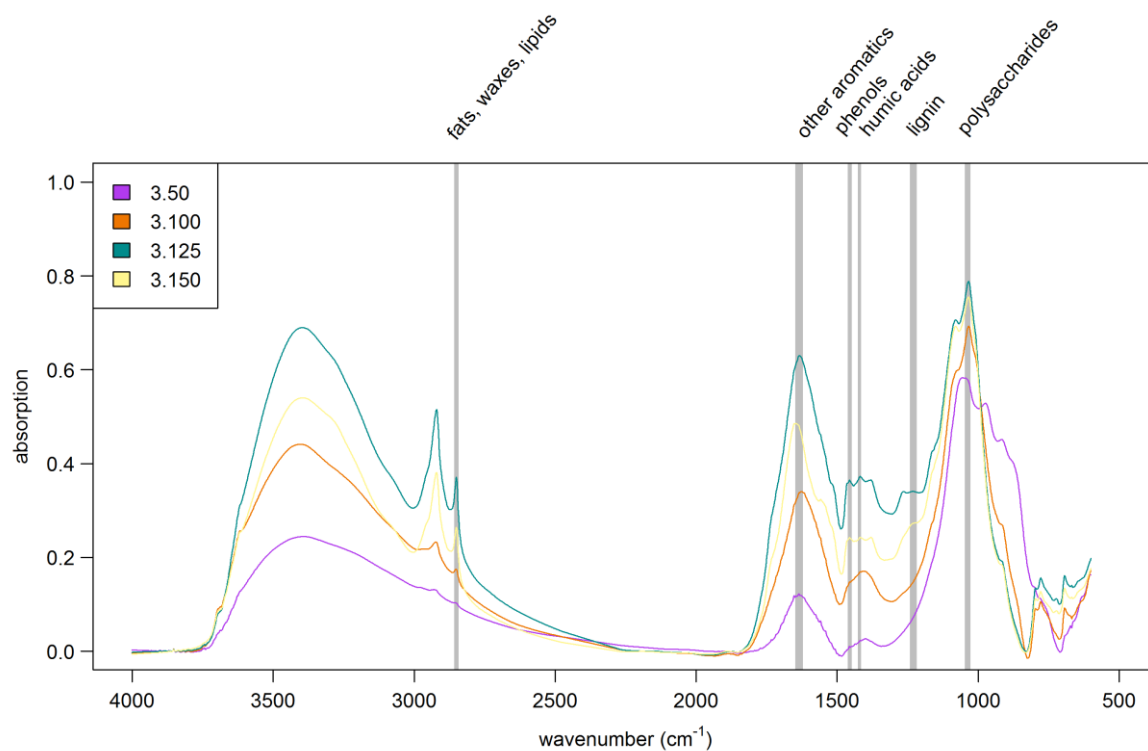

**Figure S1:** FTIR spectra of samples from transect 3.

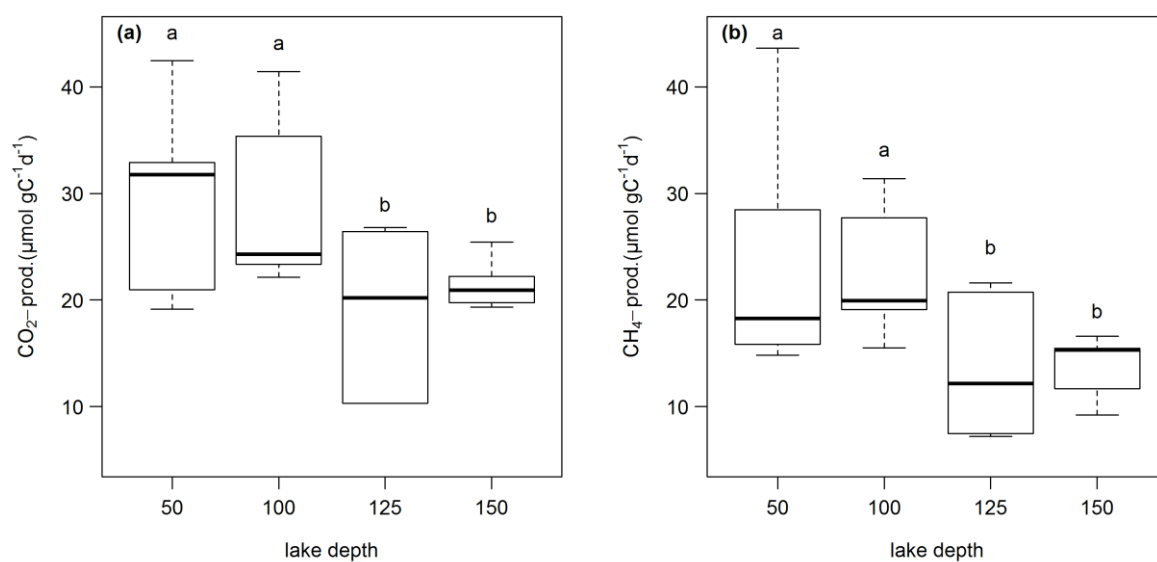

**Figure S2:** CO<sub>2</sub> (a) and CH<sub>4</sub> (b) production rates in the upper 5 cm of the sediment vs. lake depth.  $n=12$ . Different letters denote significant differences between groups.

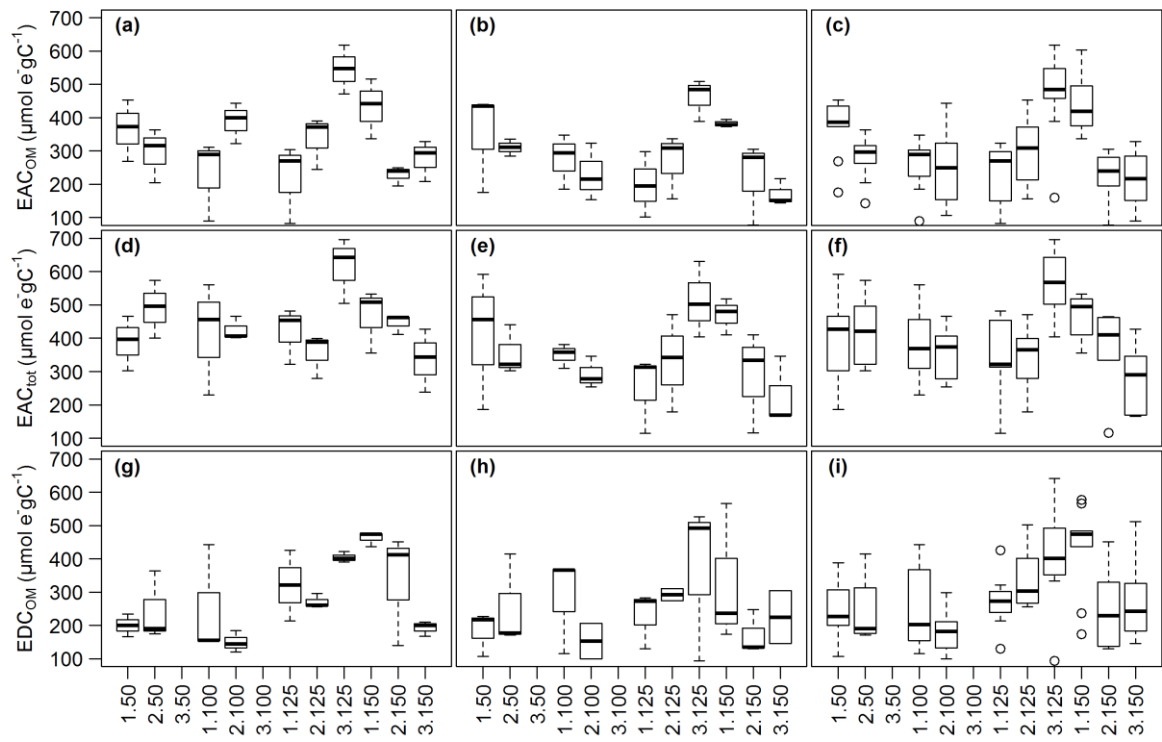

**Figure S3:** Spatio-temporal variability of  $EAC_{OM}$  (a, b, c),  $EAC_{tot}$  (d, e, f) and  $EDC_{OM}$  (g, h, i) in the incubation experiment at the beginning (a, d, g,  $n = 3$ ), and the end (b, e, h,  $n = 3$ ) of the experiment as well as average values for the whole experiment (c, f, i,  $n = 6$ ).

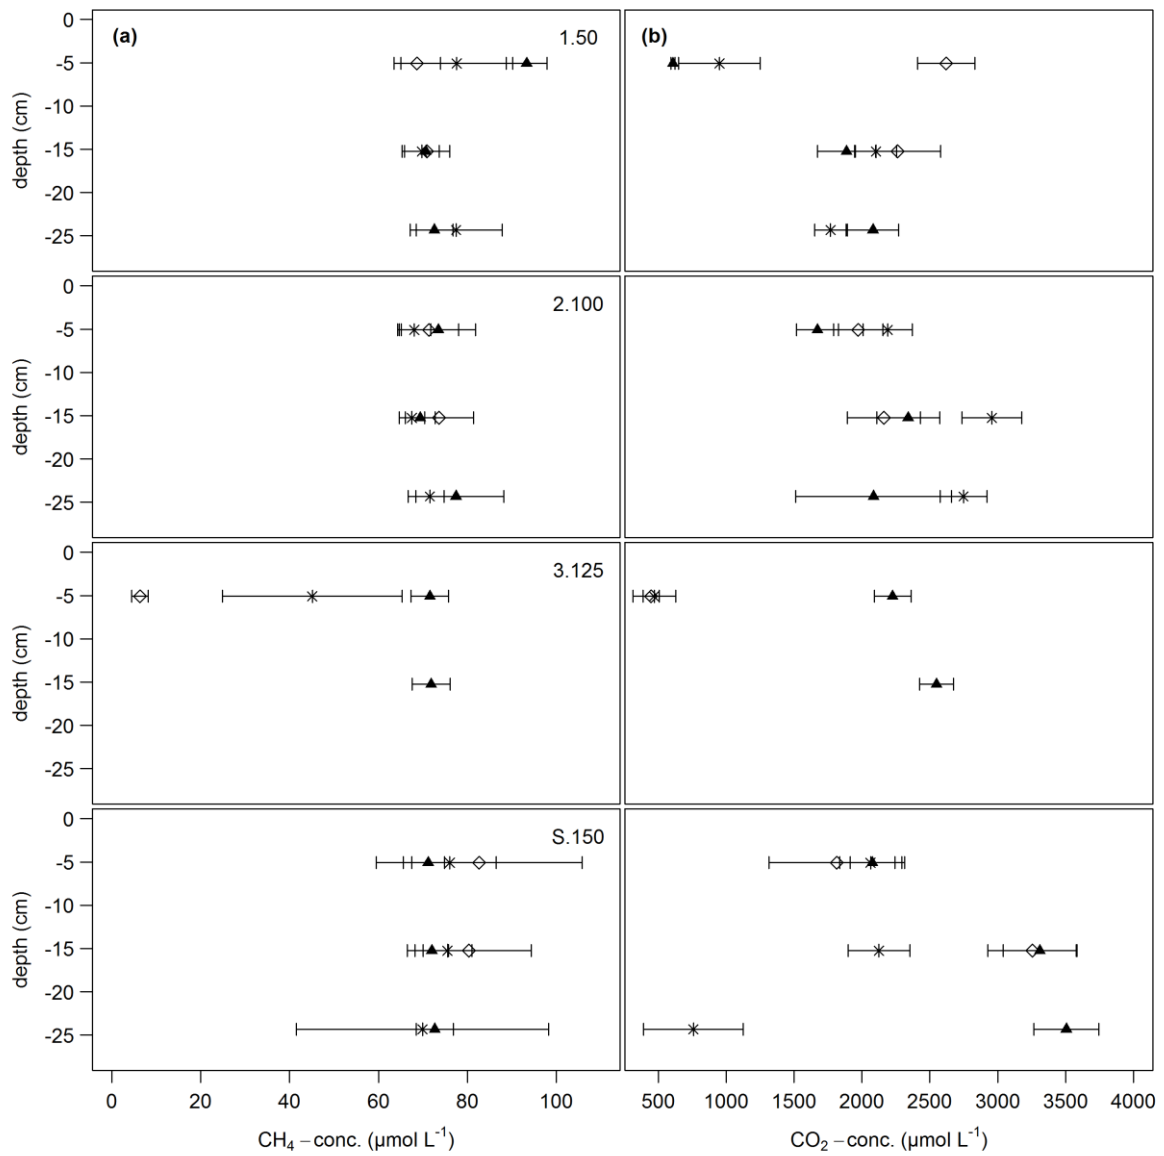

**Figure S4:** Depth profile of  $\text{CH}_4$  (a) and  $\text{CO}_2$  (b) concentration in the sediment of the mesocosms. Different symbols denote three replicates at each site. Values are means over sampling period  $\pm$  SD.  $n = 2-10$

15 **Table S1:** Spearman's rank correlation coefficients and significance levels for all measured parameters. *Italic numbers denote no significant correlations.*

|                                          | CH <sub>4</sub> production |               | CO <sub>2</sub> production |               | Q <sub>10</sub> (CH <sub>4</sub> ) |            | acetoclastic<br>methanog. |            | EDC      |            | EAC <sub>OM</sub> |               | CH <sub>4</sub> flux |               | CO <sub>2</sub> flux |               |
|------------------------------------------|----------------------------|---------------|----------------------------|---------------|------------------------------------|------------|---------------------------|------------|----------|------------|-------------------|---------------|----------------------|---------------|----------------------|---------------|
|                                          | <i>p</i>                   | <i>rho</i>    | <i>p</i>                   | <i>rho</i>    | <i>p</i>                           | <i>rho</i> | <i>p</i>                  | <i>rho</i> | <i>p</i> | <i>rho</i> | <i>p</i>          | <i>rho</i>    | <i>p</i>             | <i>rho</i>    | <i>p</i>             | <i>rho</i>    |
| <b>aromatics</b>                         | 0.001                      | -0.669        | 0.002                      | -0.641        | 0.034                              | -0.821     |                           |            |          |            |                   |               | <i>0.132</i>         | <i>-0.595</i> | <i>0.197</i>         | <i>-0.524</i> |
| <b>fats, waxes, lipids</b>               | 0.000                      | -0.700        | 0.000                      | -0.736        | 0.034                              | -0.821     |                           |            | 0.001    | 0.565      |                   |               | 0.015                | -0.833        | <i>0.428</i>         | <i>-0.333</i> |
| <b>humic acids</b>                       | 0.003                      | -0.618        | 0.001                      | -0.653        | 0.034                              | -0.821     |                           |            |          |            |                   |               | 0.015                | -0.833        | <i>0.389</i>         | <i>-0.357</i> |
| <b>lignin</b>                            | 0.003                      | -0.606        | 0.003                      | -0.610        | 0.034                              | -0.821     |                           |            |          |            |                   |               | 0.021                | -0.786        | <i>0.352</i>         | <i>-0.381</i> |
| <b>phenols</b>                           | 0.003                      | -0.606        | 0.001                      | -0.667        | 0.034                              | -0.821     |                           |            |          |            |                   |               | 0.015                | -0.833        | <i>0.389</i>         | <i>-0.357</i> |
| <b>C</b>                                 | <i>0.194</i>               | <i>-0.287</i> | <i>0.327</i>               | <i>-0.219</i> |                                    |            |                           |            |          |            |                   |               | <i>0.058</i>         | <i>-0.714</i> | <i>0.665</i>         | <i>-0.190</i> |
| <b>C/N</b>                               | <i>0.356</i>               | <i>-0.206</i> | <i>0.378</i>               | <i>-0.197</i> |                                    |            | 0.013                     | 0.447      |          |            |                   |               | 0.007                | -0.881        | <i>0.428</i>         | <i>-0.333</i> |
| <b>H<sub>2</sub> concentration</b>       | 0.000                      | 0.450         | 0.000                      | 0.515         |                                    |            |                           |            |          |            | <i>0.157</i>      | <i>-0.285</i> |                      |               |                      |               |
| <b>acetate<br/>concentration</b>         | <i>0.492</i>               | <i>0.248</i>  | <i>0.191</i>               | <i>0.455</i>  |                                    |            |                           |            |          |            | 0.002             | -0.387        |                      |               |                      |               |
| <b>hydrogenotrophic<br/>acetoclastic</b> |                            |               |                            |               |                                    |            |                           |            |          |            | 0.031             | 0.426         |                      |               |                      |               |
| <b>EAC<sub>OM</sub></b>                  | <i>0.946</i>               | <i>0.030</i>  | <i>0.470</i>               | <i>-0.261</i> |                                    |            |                           |            |          |            | <i>0.748</i>      | <i>0.042</i>  |                      |               |                      |               |
| <b>EAC<sub>inorg</sub></b>               | <i>0.204</i>               | <i>-0.442</i> | <i>1.000</i>               | <i>0.006</i>  |                                    |            |                           |            |          |            |                   |               |                      |               |                      |               |
| <b>EAC<sub>tot</sub></b>                 | <i>0.191</i>               | <i>-0.455</i> | <i>0.470</i>               | <i>-0.261</i> |                                    |            |                           |            |          |            |                   |               |                      |               |                      |               |
| <b>EDC</b>                               | 0.031                      | -0.697        | 0.039                      | -0.673        |                                    |            |                           |            |          |            |                   |               |                      |               |                      |               |
| <b>EAC/EDC</b>                           | <i>0.247</i>               | <i>0.406</i>  | <i>0.407</i>               | <i>0.297</i>  |                                    |            |                           |            |          |            |                   |               |                      |               |                      |               |
| <b>EEC</b>                               | <i>0.166</i>               | <i>-0.479</i> | <i>0.054</i>               | <i>-0.636</i> |                                    |            |                           |            |          |            |                   |               |                      |               |                      |               |
| <b>S (%)</b>                             | 0.019                      | -0.577        | <i>0.087</i>               | <i>-0.441</i> |                                    |            |                           |            |          |            |                   |               |                      |               |                      |               |
| <b>clay</b>                              |                            |               |                            |               |                                    |            |                           |            |          |            |                   |               | 0.023                | 0.648         | 0.037                | 0.605         |
| <b>silt</b>                              |                            |               |                            |               |                                    |            |                           |            |          |            |                   |               | <i>0.101</i>         | <i>0.497</i>  | <i>0.340</i>         | <i>0.302</i>  |
| <b>sand</b>                              |                            |               |                            |               |                                    |            |                           |            |          |            |                   |               | 0.023                | -0.648        | 0.037                | -0.605        |
| <b>CH<sub>4</sub> stock change</b>       |                            |               |                            |               |                                    |            |                           |            |          |            |                   |               | <i>0.163</i>         | <i>-0.222</i> | <i>0.714</i>         | <i>-0.064</i> |
| <b>CO<sub>2</sub> stock change</b>       |                            |               |                            |               |                                    |            |                           |            |          |            |                   |               | <i>0.762</i>         | <i>-0.049</i> | <i>0.776</i>         | <i>0.050</i>  |
