# Supplementary material for: Organic matter and sediment properties determine in-lake variability of sediment CO 2 and CH 4 production and emissions of a small and shallow lake
Source: Copernicus journal article supplement (doi:10.5194/bg-2019-284), 2019-08-29
Supplement: Supplementary file 1 [file Supporting Information.xlsx]

## Sheet: incubations
site	transect	lake depth	sediment depth	replicate	time	block	CO2 m	CO2 m MW	CO2 C	CO2 C MW	CO2 t0-t3-t6	CO2 t0-t3-t6 MW	CO2 t0-t2-t5	CO2 t0-t2-t5 MW	CO2 n	CO2 n MW	CO2 EC	CO2 EC MW	CH4 m	CH4 m MW	CH4 C	CH4 C MW	CH4 t0-t3-t6	CH4 t0-t3-t6 MW	CH4 t0-t2-t5	CH4 t0-t2-t5 MW	CH4 n	CH4 n MW	CH4 EC	CH4 EC MW	CO2/CH4 C	CO2/CH4 C MW	CO2/CH4 n	CO2/CH4 n MW	CO2/CH4 EC	CO2/CH4 EC MW	delta 15N	delta 13C	N(%)	S(%)	C(%)	C/N	EAC	EAC MW	EDC	EDC MW	EAC/EDC	EAC/EDC MW	EEC
1.05	1	50	0-5	1	0	2	6.15643	6.37759	19.1312	19.8185	32.4785	33.0141	16.9932	15.4235	29.554	28.6895	7.2535	7.14579	5.09773	4.95108	15.8413	15.3856	20.8155	20.036	13.0574	11.6302	3.05233	2.87924	0.00178379	0.00236171	1.20768	1.28899	9.68245	9.9841	4066.36	3168.01	-0.4543	-27.8394	1.96	0.49	32.18	16.4184	373.142	365.178	200.439	200.058	1.86162	1.80726	573.582
1.05	1	50	0-5	2	0	2	6.23306		19.3694		31.807		16.095		28.476		6.96219		4.77224		14.8298		18.976		10.8356		2.68989		0.00229139		1.30611		10.5863		3038.41		-0.4543	-27.8394	1.96	0.49	32.18	16.4184	453.457		233.74		1.94001		687.197
1.05	1	50	0-5	3	0	2	6.74327		20.9549		34.7568		13.1824		28.0386		7.22168		4.98326		15.4856		20.3165		10.9977		2.8955		0.00300997		1.35318		9.68352		2399.26		-0.4543	-27.8394	1.96	0.49	32.18	16.4184	268.934		165.994		1.62014		434.927
1.05	1	50	5-10	1	0	2	3.76609	3.79259	11.3573	11.4372	15.5326	15.8405	7.95744	8.45828	16.7848	17.4022			3.29809	3.2866	9.946	9.91135	11.3119	12.5937	6.88659	8.98247	2.95959	3.35312			1.1419	1.17539	5.67132	5.26192			-0.35	-27.7136	1.91	0.5	33.16	17.3613
1.05	1	50	5-10	2	0	2	3.6689		11.0642		14.499		7.3799		15.8818				2.68186		8.08765		10.9145		6.76261		2.91926				1.36804		5.44037				-0.35	-27.7136	1.91	0.5	33.16	17.3613
1.05	1	50	5-10	3	0	2	3.94277		11.8901		17.4901		10.0375		19.5399				3.87985		11.7004		15.5547		13.2982		4.18051				1.01622		4.67405				-0.35	-27.7136	1.91	0.5	33.16	17.3613
1.1	1	100	0-5	1	0	1	6.65	6.67961	23.3661	23.4702	37.9449	38.924	27.1072	30.4572	8.66249	5.64474	19.5129	19.5464	5.47934	5.45549	19.2528	19.169	27.2041	27.2654	20.3916	21.5953	0.249356	0.272857	0.00170354	0.000828848	1.21365	1.2247	34.7394	22.7362	11454.3	37131.3	-0.4558	-27.4114	2	0.47	28.46	14.23	288.945	229.793	151.741	249.872	1.90421	1.0608	440.686
1.1	1	100	0-5	2	0	1	6.4705		22.7354		37.5905		30.3114		3.79377		19.9244		5.21462		18.3226		25.6897		18.3584		0.170622		0.0003915		1.24084		22.2349		50892.4		-0.4558	-27.4114	2	0.47	28.46	14.23	310.855		442.106		0.703123		752.961
1.1	1	100	0-5	3	0	1	6.91832		24.3089		41.2365		33.953		4.47797		19.202		5.67251		19.9315		28.9024		26.036		0.398593		0.0003915		1.21962		11.2344		49047.2		-0.4558	-27.4114	2	0.47	28.46	14.23	89.5802		155.77		0.575082		245.35
1.1	1	100	5-10	1	0	1	2.52165	2.61942	8.9452	9.29202	11.8445	12.4955	9.92362	10.6697	3.505	3.78225			2.34988	2.44708	8.33586	8.68066	9.04216	9.82006	10.4489	12.0319	0.430243	0.466692			1.0731	1.07168	8.14656	8.23148			-0.4647	-27.4358	1.91	0.48	28.19	14.7592
1.1	1	100	5-10	2	0	1	2.76697		9.81544		13.3818		11.5418		3.65524				2.65408		9.41498		10.787		13.553		0.543751				1.04253		6.72227				-0.4647	-27.4358	1.91	0.48	28.19	14.7592
1.1	1	100	5-10	3	0	1	2.56964		9.11543		12.2602		10.5438		4.18652				2.33727		8.29114		9.63106		12.0938		0.426082				1.09942		9.82562				-0.4647	-27.4358	1.91	0.48	28.19	14.7592
1.125	1	125	0-5	1	0	1	5.41364	5.6717	19.0554	19.9637	30.2954	32.0289	26.1427	27.6046	2.30647	2.41982	22.4961	21.5543	3.18261	3.3762	11.2024	11.8838	14.3616	15.2876	9.84923	9.74356	0.10114	0.105771	0.00820367	0.00299556	1.701	1.68058	22.8046	22.9171	2742.21	36815.9	-0.7306	-27.6743	2.2	0.48	28.41	12.9136	82.7303	218.693	321.761	320.442	0.257117	0.744169	404.491
1.125	1	125	0-5	2	0	1	5.73838		20.1985		32.4791		28.9305		2.45946		27.009		3.48947		12.2826		15.772		10.3597		0.113301		0.0003915		1.64448		21.7074		68988.3		-0.7306	-27.6743	2.2	0.48	28.41	12.9136	269.561		213.547		1.2623		483.108
1.125	1	125	0-5	3	0	1	5.86307		20.6374		33.312		27.7406		2.49355		15.1578		3.45651		12.1665		15.7291		9.0217		0.102872		0.0003915		1.69624		24.2393		38717.1		-0.7306	-27.6743	2.2	0.48	28.41	12.9136	303.788		426.018		0.713088		729.806
1.125	1	125	5-10	1	0	1	3.05732	2.94371	10.7538	10.3542	14.8098	14.1124	11.4346	11.067	2.25292	2.76806			2.45462	2.38555	8.6339	8.39095	9.22375	9.04614	8.51329	8.98683	0.0155607	0.102395			1.24554	1.23381	144.783	62.135			-0.8055	-27.6948	2.17	0.49	28.43	13.1014
1.125	1	125	5-10	2	0	1	2.90401		10.2146		13.7287		10.2626		2.89894				2.36645		8.32378		8.81737		8.80064		0.134331				1.22716		21.5806				-0.8055	-27.6948	2.17	0.49	28.43	13.1014
1.125	1	125	5-10	3	0	1	2.8698		10.0943		13.7986		11.5038		3.15233				2.33557		8.21517		9.0973		9.64658		0.157294				1.22874		20.041				-0.8055	-27.6948	2.17	0.49	28.43	13.1014
1.15	1	150	0-5	1	0	3	5.04279	5.09251	19.4777	19.6698	30.7559	30.6869	24.5156	23.7201	10.6761	13.1276	18.3004	15.0266	3.88216	3.94969	14.9948	15.2557	17.1346	17.4649	14.8991	15.0177	0.599827	0.761887	0.00134887	0.000949354	1.29896	1.28945	17.7986	17.2782	13567.2	11257.5	-1.3942	-27.4254	2.36		25.89	10.9703	442.57	431.791	477.339	462.689	0.927162	0.928911	919.91
1.15	1	150	0-5	2	0	3	5.11843		19.7699		31.1824		24.5061		12.233		13.4145		4.00464		15.4679		17.6404		14.8984		0.721843		0.00149919		1.27812		16.9469		8947.84		-1.3942	-27.4254	2.36		25.89	10.9703	516.556		474.246		1.08922		990.801
1.15	1	150	0-5	3	0	3	5.11633		19.7618		30.1224		22.1385		16.4737		13.3648		3.96226		15.3042		17.6196		15.2554		0.963993		0		1.29127		17.0891				-1.3942	-27.4254	2.36		25.89	10.9703	336.247		436.483		0.770355		772.73
1.15	1	150	5-10	1	0	3	3.7953	3.69011	14.4253	14.0255	21.6363	20.8455	16.2343	15.7839	10.59	9.90953			2.99525	2.84514	11.3845	10.8139	12.6275	12.0085	11.4291	10.7633	1.09282	0.96224			1.26711	1.30095	9.69049	10.4106			-1.3576	-27.4073	2.36		26.31	11.1483
1.15	1	150	5-10	2	0	3	3.70495		14.0819		21.0685		16.1163		10.5619				2.62766		9.98732		11.1867		10.0938		1.04169				1.40998		10.1392				-1.3576	-27.4073	2.36		26.31	11.1483
1.15	1	150	5-10	3	0	3	3.57008		13.5693		19.8315		15.0012		8.5767				2.91251		11.07		12.2112		10.7672		0.752207				1.22577		11.402				-1.3576	-27.4073	2.36		26.31	11.1483
2.05	2	50	0-5	1	0	1	8.53239	8.71985	32.4425	33.1553	50.9991	52.6059	50.3535	49.0804	2.74617	2.62351	25.3214	33.0319	4.59219	4.78431	17.4608	18.1913	17.3532	18.2806	15.8106	13.4973	1.49261	1.16054	0.0003915	0.00129835	1.85802	1.82388	1.83984	2.35059	64677.7	65511	-0.7943	-27.5401	1.98	0.38	26.3	13.2828	205.182	294.864	190.544	243.272	1.07682	1.33973	395.727
2.05	2	50	0-5	2	0	1	8.97032		34.1077		54.1008		49.8782		2.39788		25.3408		4.80742		18.2792		18.4544		13.2671		1.07354		0.00311205		1.86593		2.23362		8142.8		-0.7943	-27.5401	1.98	0.38	26.3	13.2828	316.525		364.254		0.86897		680.779
2.05	2	50	0-5	3	0	1	8.65683		32.9157		52.7178		47.0095		2.72649		48.4335		4.95331		18.8339		19.0341		11.4142		0.915452		0.0003915		1.74769		2.9783		123712		-0.7943	-27.5401	1.98	0.38	26.3	13.2828	362.884		175.018		2.07341		537.901
2.05	2	50	5-10	1	0	1	3.24678	3.18993	14.9759	14.7137	20.3656	20.0374	9.4799	9.07918	12.4677	13.0148			3.07277	3.09251	14.1733	14.2644	15.5082	16.0621	12.7883	14.6586	3.06072	1.36129			1.05663	1.0315	4.07345	19.1254			-0.6199	-27.6459	1.51	0.32	21.68	14.3576
2.05	2	50	5-10	2	0	1	3.26603		15.0647		20.1994		8.85938		12.974				3.1912		14.7196		16.6167		15.2447		0.423989				1.02345		30.5998				-0.6199	-27.6459	1.51	0.32	21.68	14.3576
2.05	2	50	5-10	3	0	1	3.057		14.1005		19.547		8.89826		13.6027				3.01356		13.9002		16.0614		15.9428		0.599162				1.01441		22.7029				-0.6199	-27.6459	1.51	0.32	21.68	14.3576
2.1	2	100	0-5	1	0	2	11.6658	10.8421	41.4416	38.5154	75.1506	70.6739	31.8438	30.5289	35.7131	34.9332	7.86616	9.47291	8.83012	8.30181	31.3681	29.4913	39.7083	38.6839	15.5357	15.894	1.62851	1.68067	0	0	1.32114	1.30509	21.93	20.8531			-0.9421	-27.6025	2.31	0.42	28.15	12.1861	399.543	388.618	119.857	149.543	3.3335	2.65821	519.401
2.1	2	100	0-5	2	0	2	10.9012		38.7254		71.0045		29.4897		35.0926		10.9288		8.27347		29.3907		38.8238		15.7718		1.61539		0		1.31761		21.724				-0.9421	-27.6025	2.31	0.42	28.15	12.1861	322.485		144.143		2.23726		466.627
2.1	2	100	0-5	3	0	2	9.95919		35.379		65.8666		30.2531		33.9939		9.62373		7.80185		27.7153		37.5195		16.3744		1.79812		0		1.27652		18.9053				-0.9421	-27.6025	2.31	0.42	28.15	12.1861	443.825		184.629		2.40387		628.454
2.1	2	100	5-10	1	0	2	4.08974	4.07109	14.5594	14.493	20.7273	20.3404	10.8716	10.5246	15.9148	16.4117			3.42771	3.44592	12.2026	12.2674	13.2437	13.2601	8.66579	8.8131	1.96814	2.03235			1.19314	1.18157	8.08623	8.09435			-0.871	-27.735	2.26	0.42	28.09	12.4292
2.1	2	100	5-10	2	0	2	3.8307		13.6373		19.089		10.0156		16.4006				3.25003		11.57		12.6133		8.20503		1.92506				1.17867		8.51952				-0.871	-27.735	2.26	0.42	28.09	12.4292
2.1	2	100	5-10	3	0	2	4.29283		15.2824		21.2049		10.6866		16.9197				3.66001		13.0296		13.9232		9.5685		2.20385				1.1729		7.6773				-0.871	-27.735	2.26	0.42	28.09	12.4292
2.125	2	125	0-5	1	0	2	7.88366	7.85436	26.7606	26.6611	50.2563	48.3029	21.6262	20.1488	24.4037	23.4483	15.414	17.0893	6.36162	6.23976	21.5941	21.1805	33.6612	31.8724	16.0773	14.5536	1.8273	1.63475	0	0.000454086	1.23925	1.259	13.3551	14.4089		13475.2	-1.1318	-27.6325	2.45	0.47	29.46	12.0245	372.36	335.963	260.409	270.683	1.4299	1.23587	632.769
2.125	2	125	0-5	2	0	2	7.78899		26.4392		47.5217		19.3695		23.2434		17.4973		6.10865		20.7354		30.6597		13.5384		1.51801		0		1.27508		15.3118				-1.1318	-27.6325	2.45	0.47	29.46	12.0245	390.609		295.986		1.31969		686.596
2.125	2	125	0-5	3	0	2	7.89043		26.7835		47.1308		19.4508		22.6979		18.3567		6.24902		21.2119		31.2962		14.0451		1.55893		0.00136226		1.26267		14.5599		13475.2		-1.1318	-27.6325	2.45	0.47	29.46	12.0245	244.921		255.653		0.958022		500.574
2.125	2	125	5-10	1	0	2	3.3979	3.35117	11.5772	11.418	15.8969	15.4816	8.8066	8.44226	11.5161	11.9707			3.13364	3.12782	10.6768	10.657	11.7443	11.6727	8.45897	7.73814	1.71513	1.63372			1.08433	1.07141	6.71444	7.34539			-1.0122	-27.6631	2.39	0.47	29.35	12.2803
2.125	2	125	5-10	2	0	2	3.31838		11.3062		15.3288		8.08578		11.5959				3.10803		10.5895		11.5557		7.03339		1.50117				1.06768		7.72459				-1.0122	-27.6631	2.39	0.47	29.35	12.2803
2.125	2	125	5-10	3	0	2	3.33724		11.3705		15.2193		8.4344		12.8001				3.14179		10.7046		11.718		7.72206		1.68485				1.06221		7.59715				-1.0122	-27.6631	2.39	0.47	29.35	12.2803
2.15	2	150	0-5	1	0	1	5.75247	6.51535	19.336	21.9003	31.3295	35.1256	33.1434	34.4645	1.11259	1.15557	25.4755	35.4543	2.7388	3.02409	9.20604	10.165	11.2282	12.589	9.22443	10.2458	0.0891366	0.112751	0.00226685	0.00180024	2.10036	2.15209	12.4819	10.3988	11238.3	39700.3	-1.003	-27.6549	2.35	0.48	29.75	12.6596	240.126	228.129	450.636	334.386	0.532861	0.929026	690.762
2.15	2	150	0-5	2	0	1	6.22528		20.9253		33.4245		32.5374		0.943091		35.7901		2.85747		9.60494		11.8888		9.57445		0.113687		0.0003915		2.1786		8.29547		91417.9		-1.003	-27.6549	2.35	0.48	29.75	12.6596	249.457		139.986		1.78201		389.443
2.15	2	150	0-5	3	0	1	7.5683		25.4397		40.6226		37.7127		1.41104		45.0973		3.476		11.684		14.65		11.9384		0.135428		0.00274238		2.1773		10.4191		16444.6		-1.003	-27.6549	2.35	0.48	29.75	12.6596	194.803		412.536		0.472209		607.339
2.15	2	150	5-10	1	0	1	3.88643	4.21958	13.1699	14.2988	17.9299	20.7833	16.6879	20.4288	1.55966	2.76557			2.37304	2.57369	8.04146	8.72142	7.89925	8.92975	6.9009	8.16235	0.0668458	0.114651			1.63775	1.638	23.3321	24.0114			-1.078	-27.6335	2.35	0.48	29.51	12.5574
2.15	2	150	5-10	2	0	1	4.87808		16.5303		24.7627		24.7754		3.3838				2.93855		9.9578		10.4694		9.50126		0.144412				1.66003		23.4316				-1.078	-27.6335	2.35	0.48	29.51	12.5574
2.15	2	150	5-10	3	0	1	3.89424		13.1963		19.6574		19.8232		3.35324				2.40949		8.165		8.42057		8.08488		0.132695				1.61621		25.2703				-1.078	-27.6335	2.35	0.48	29.51	12.5574
3.05	3	50	0-5	1	0	3	0.68316	0.754144	31.7749	35.0764	48.2968	53.2681	2.3025	2.6343	23.6897	19.9365			0.612515	0.72089	28.489	33.5297	34.0685	40.3645	26.3225	33.6446	2.60874	2.54265			1.11534	1.05912	9.0809	8.0592			-6.2714	-27.3	0.15		2.15	14.3333
3.05	3	50	0-5	2	0	3	0.666347		30.9929		47.4426		2.51109		14.6935				0.611829		28.4571		33.5054		30.0258		1.70058				1.08911		8.64027				-6.2714	-27.3	0.15		2.15	14.3333
3.05	3	50	0-5	3	0	3	0.912924		42.4616		64.0649		3.0893		21.4264				0.938326		43.6431		53.5195		44.5855		3.31861				0.972929		6.45643				-6.2714	-27.3	0.15		2.15	14.3333
3.1	3	100	0-5	1	0	3	2.51678	2.51971	23.6207	23.6481	29.8949	30.3329	4.93622	5.08735	37.9385	37.4897			2.03628	1.9591	19.1111	18.3867	18.5037	17.9249	8.20256	7.76239	2.29174	2.1498			1.23597	1.29661	16.5544	17.8323			1.3257	-27.835	0.56		10.655	19.0628
3.1	3	100	0-5	2	0	3	2.68143		25.1659		32.0166		5.04931		37.4744				2.18829		20.5377		20.2419		8.62332		2.44164				1.22535		15.348				1.3257	-27.835	0.56		10.655	19.0628
3.1	3	100	0-5	3	0	3	2.36092		22.1578		29.0873		5.27652		37.0562				1.65272		15.5112		15.029		6.46128		1.71601				1.4285		21.5944				1.3257	-27.835	0.56		10.655	19.0628
3.125	3	125	0-5	1	0	3	2.90466	2.90407	10.3112	10.3091	14.7032	14.7137	11.2949	10.9567	13.1493	15.5544	9.11086	9.5237	2.02701	2.05564	7.19563	7.29726	7.90714	8.02858	6.49857	6.52322	1.14182	1.24914	0.00117424	0.00108255	1.43298	1.41323	11.5161	12.4532	7758.97	9447.96	-0.0788	-27.5858	1.74		28.17	16.1897	547.86	545.709	390.507	404.47	1.40295	1.34762	938.367
3.125	3	125	0-5	2	0	3	2.90449		10.3106		14.6122		10.9895		15.2323		8.91139		2.02974		7.20534		7.9083		6.3384		1.13749		0.00130722		1.43096		13.3912		6817.05		-0.0788	-27.5858	1.74		28.17	16.1897	470.77		400.891		1.17431		871.661
3.125	3	125	0-5	3	0	3	2.90306		10.3055		14.8256		10.5858		18.2815		10.5488		2.11016		7.49082		8.27031		6.73267		1.46811		0.000766193		1.37575		12.4524		13767.9		-0.0788	-27.5858	1.74		28.17	16.1897	618.497		422.012		1.46559		1040.51
3.125	3	125	5-10	1	0	3	2.00383	2.03223	7.08819	7.18865	9.98131	10.0674	6.98734	7.34882	7.52528	8.85867			1.52325	1.51555	5.38822	5.36098	5.98403	5.94245	6.36762	6.2884	1.17364	1.16578			1.3155	1.34422	6.41193	7.50916			0.0393	-27.4421	1.73		28.27	16.341
3.125	3	125	5-10	2	0	3	2.04937		7.24926		10.0346		7.32005		7.0336				1.42243		5.0316		5.73963		6.18027		0.988642				1.44075		7.11441				0.0393	-27.4421	1.73		28.27	16.341
3.125	3	125	5-10	3	0	3	2.0435		7.22851		10.1863		7.73908		12.0171				1.60096		5.66311		6.10368		6.31732		1.33507				1.27642		9.00115				0.0393	-27.4421	1.73		28.27	16.341
3.15	3	150	0-5	1	0	2	6.75007	6.65746	22.6817	22.3705	40.4261	38.9968	20.8476	19.5285	24.673	23.0615	14.2939	14.0051	4.93964	4.74519	16.5983	15.9449	24.1893	22.9292	13.6773	12.3325	1.88363	1.52802	0.0080725	0.00322298	1.36651	1.40387	13.0987	15.3623	1770.69	5712.91	-0.9552	-27.622	2.37	0.48	29.76	12.557	328.724	277.056	209.767	192.473	1.56709	1.45505	538.491
3.15	3	150	0-5	2	0	2	6.6133		22.2221		38.309		18.1304		22.1186		15.4138		4.69949		15.7913		22.9041		11.9898		1.38137		0.00159644		1.40724		16.0121		9655.12		-0.9552	-27.622	2.37	0.48	29.76	12.557	207.782		200.292		1.03739		408.075
3.15	3	150	0-5	3	0	2	6.60901		22.2077		38.2553		19.6075		22.3928		12.3076		4.59645		15.445		21.6943		11.3303		1.31907		0		1.43785		16.9762				-0.9552	-27.622	2.37	0.48	29.76	12.557	294.662		167.36		1.76065		462.022
3.15	3	150	5-10	1	0	2	3.42445	3.54046	11.5965	11.9894	15.3098	16.1459	9.33933	9.74068	12.3798	14.1357			3.02043	3.20921	10.2283	10.8676	10.7662	11.5643	6.77743	7.20322	1.22121	1.45481			1.13377	1.10403	10.1373	9.78084			-0.9524	-27.6401	2.35	0.47	29.53	12.566
3.15	3	150	5-10	2	0	2	3.66775		12.4204		16.9028		9.95574		15.2268				3.32611		11.2635		11.9695		7.33254		1.46919				1.10271		10.364				-0.9524	-27.6401	2.35	0.47	29.53	12.566
3.15	3	150	5-10	3	0	2	3.52918		11.9512		16.2252		9.92696		14.8004				3.28109		11.111		11.9572		7.4997		1.67403				1.07561		8.84121				-0.9524	-27.6401	2.35	0.47	29.53	12.566
1.05	1	50	0-5	1	6	2	6.15643	6.37759	19.1312	19.8185	12.0002	12.6924	3.88915	4.18928	144.04	147.518	85.3582	83.113	5.09773	4.95108	15.8413	15.3856	12.3681	12.0937	12.2083	11.9441	92.1943	90.1656	33.4385	32.8957	1.20768	1.28899	1.56235	1.63682	2.55269	2.53225	-0.4543	-27.8394	1.96	0.49	32.18	16.4184	439.357	349.846	217.21	183.436	2.02274	1.86284	656.567
1.05	1	50	0-5	2	6	2	6.23306		19.3694		12.6842		4.09164		146.191		78.468		4.77224		14.8298		11.9129		11.9077		87.8197		29.8701		1.30611		1.66468		2.62697		-0.4543	-27.8394	1.96	0.49	32.18	16.4184	175.322		106.428		1.64733		281.75
1.05	1	50	0-5	3	6	2	6.74327		20.9549		13.3928		4.58705		152.323		85.5129		4.98326		15.4856		12.0001		11.7162		90.4827		35.3785		1.35318		1.68345		2.41708		-0.4543	-27.8394	1.96	0.49	32.18	16.4184	434.86		226.671		1.91847		661.53
1.05	1	50	5-10	1	6	2	3.76609	3.79259	11.3573	11.4372	9.16373	9.26302	3.30086	3.6838	106.426	106.479			3.29809	3.2866	9.946	9.91135	8.72902	7.62594	8.84196	5.82709	77.4655	73.5994			1.1419	1.17539	1.37385	1.47532			-0.35	-27.7136	1.91	0.5	33.16	17.3613
1.05	1	50	5-10	2	6	2	3.6689		11.0642		9.74724		4.58461		109.944				2.68186		8.08765		5.11856		-0.204647		61.1453				1.36804		1.79808				-0.35	-27.7136	1.91	0.5	33.16	17.3613
1.05	1	50	5-10	3	6	2	3.94277		11.8901		8.87808		3.16592		103.066				3.87985		11.7004		9.03023		8.84396		82.1874				1.01622		1.25404				-0.35	-27.7136	1.91	0.5	33.16	17.3613
1.1	1	100	0-5	1	6	1	6.65	6.67961	23.3661	23.4702	10.626	10.0708	2.03286	1.98569	131.156	131.496	45.3509	47.8428	5.47934	5.45549	19.2528	19.169	11.6786	11.4115	11.1171	10.7299	93.2236	93.7696	1.46678	1.61789	1.21365	1.2247	1.4069	1.40261	30.9186	29.8629	-0.4558	-27.4114	2	0.47	28.46	14.23	185.05	275.661	368.503	283.471	0.502168	1.32989	553.553
1.1	1	100	0-5	2	6	1	6.4705		22.7354		9.56311		1.5748		127.236		49.4595		5.21462		18.3226		10.9611		9.85239		90.2283		1.88413		1.24084		1.41016		26.2505		-0.4558	-27.4114	2	0.47	28.46	14.23	294.022		115.896		2.53695		409.917
1.1	1	100	0-5	3	6	1	6.91832		24.3089		10.0232		2.34942		136.095		48.718		5.67251		19.9315		11.5949		11.2203		97.8568		1.50274		1.21962		1.39076		32.4195		-0.4558	-27.4114	2	0.47	28.46	14.23	347.91		366.014		0.950537		713.924
1.1	1	100	5-10	1	6	1	2.52165	2.61942	8.9452	9.29202	6.65192	6.55944	1.62578	1.32492	65.9328	65.7665			2.34988	2.44708	8.33586	8.68066	7.70498	7.65203	7.89718	7.93975	54.8533	55.1751			1.0731	1.07168	1.20198	1.19284			-0.4647	-27.4358	1.91	0.48	28.19	14.7592
1.1	1	100	5-10	2	6	1	2.76697		9.81544		6.84824		1.4206		67.5396				2.65408		9.41498		8.13336		8.22002		58.0856				1.04253		1.16276				-0.4647	-27.4358	1.91	0.48	28.19	14.7592
1.1	1	100	5-10	3	6	1	2.56964		9.11543		6.17817		0.928386		63.8272				2.33727		8.29114		7.11775		7.70206		52.5863				1.09942		1.21376				-0.4647	-27.4358	1.91	0.48	28.19	14.7592
1.125	1	125	0-5	1	6	1	5.41364	5.6717	19.0554	19.9637	9.45201	9.73201	1.88156	2.12174	103.007	101.976	52.6871	53.3953	3.18261	3.3762	11.2024	11.8838	8.02962	8.45118	7.64925	8.26943	53.3842	53.1487	1.69356	1.54912	1.701	1.68058	1.92954	1.91876	31.1103	34.9859	-0.7306	-27.6743	2.2	0.48	28.41	12.9136	195.226	198.29	282.088	228.028	0.692075	1.12243	477.314
1.125	1	125	0-5	2	6	1	5.73838		20.1985		10.0281		2.43654		100.421		52.8036		3.48947		12.2826		8.89378		9.24037		53.2976		1.64158		1.64448		1.88416		32.1664		-0.7306	-27.6743	2.2	0.48	28.41	12.9136	297.631		129.345		2.30106		426.976
1.125	1	125	0-5	3	6	1	5.86307		20.6374		9.7159		2.04712		102.498		54.6951		3.45651		12.1665		8.43015		7.91867		52.7643		1.31223		1.69624		1.94257		41.681		-0.7306	-27.6743	2.2	0.48	28.41	12.9136	102.013		272.651		0.374153		374.665
1.125	1	125	5-10	1	6	1	3.05732	2.94371	10.7538	10.3542	7.41874	7.4012	1.93923	1.77701	65.9876	64.5251			2.45462	2.38555	8.6339	8.39095	8.07464	7.86171	8.4047	8.19378	47.9296	47.1348			1.24554	1.23381	1.37676	1.36888			-0.8055	-27.6948	2.17	0.49	28.43	13.1014
1.125	1	125	5-10	2	6	1	2.90401		10.2146		7.74687		1.69474		63.381				2.36645		8.32378		8.01013		7.77318		46.4776				1.22716		1.36369				-0.8055	-27.6948	2.17	0.49	28.43	13.1014
1.125	1	125	5-10	3	6	1	2.8698		10.0943		7.03798		1.69705		64.2066				2.33557		8.21517		7.50035		8.40346		46.9972				1.22874		1.36618				-0.8055	-27.6948	2.17	0.49	28.43	13.1014
1.15	1	150	0-5	1	6	3	5.04279	5.09251	19.4777	19.6698	9.26537	9.7172	3.80653	3.86553	84.6398	87.8402	59.3919	57.0586	3.88216	3.94969	14.9948	15.2557	12.5927	12.8852	14.458	14.8785	52.1452	53.5163	7.99647	6.97816	1.29896	1.28945	1.62316	1.6413	7.42727	8.23182	-1.3942	-27.4254	2.36		25.89	10.9703	378.706	382.435	237.021	325.414	1.59777	1.48278	615.728
1.15	1	150	0-5	2	6	3	5.11843		19.7699		9.34939		3.78419		88.0649		52.4007		4.00464		15.4679		13.0617		15.0087		54.5634		6.15508		1.27812		1.61399		8.51341		-1.3942	-27.4254	2.36		25.89	10.9703	395.554		565.831		0.699068		961.386
1.15	1	150	0-5	3	6	3	5.11633		19.7618		10.5368		4.00587		90.8159		59.3831		3.96226		15.3042		13.0012		15.1687		53.8403		6.78294		1.29127		1.68677		8.75478		-1.3942	-27.4254	2.36		25.89	10.9703	373.044		173.388		2.15149		546.432
1.15	1	150	5-10	1	6	3	3.7953	3.69011	14.4253	14.0255	8.2422	8.1745	3.074	3.13323	79.3015	78.0082			2.99525	2.84514	11.3845	10.8139	10.1694	9.58515	11.7517	11.0314	50.8353	48.9468			1.26711	1.30095	1.55997	1.60021			-1.3576	-27.4073	2.36		26.31	11.1483
1.15	1	150	5-10	2	6	3	3.70495		14.0819		8.24318		3.40841		79.1172				2.62766		9.98732		8.71142		9.90789		44.9805				1.40998		1.75892				-1.3576	-27.4073	2.36		26.31	11.1483
1.15	1	150	5-10	3	6	3	3.57008		13.5693		8.03812		2.91728		75.606				2.91251		11.07		9.87469		11.4346		51.0247				1.22577		1.48175				-1.3576	-27.4073	2.36		26.31	11.1483
2.05	2	50	0-5	1	6	1	8.53239	8.71985	32.4425	33.1553	16.5484	17.0458	2.77834	3.68319	171.062	172.897	60.3649	69.1	4.59219	4.78431	17.4608	18.1913	17.0206	17.7802	16.5369	18.6389	82.722	85.1998	1.30521	1.31301	1.85802	1.82388	2.06791	2.03169	46.249	53.5772	-0.7943	-27.5401	1.98	0.38	26.3	13.2828	335.849	310.811	176.814	254.129	1.89945	1.46907	512.664
2.05	2	50	0-5	2	6	1	8.97032		34.1077		17.003		3.35323		169.458		83.1498		4.80742		18.2792		17.6436		18.4147		81.991		1.17524		1.86593		2.06678		70.751		-0.7943	-27.5401	1.98	0.38	26.3	13.2828	284.962		414.357		0.687721		699.319
2.05	2	50	0-5	3	6	1	8.65683		32.9157		17.5859		4.91801		178.17		63.7853		4.95331		18.8339		18.6764		20.9653		90.8863		1.45856		1.74769		1.96036		43.7317		-0.7943	-27.5401	1.98	0.38	26.3	13.2828	311.621		171.217		1.82003		482.838
2.05	2	50	5-10	1	6	1	3.24678	3.18993	14.9759	14.7137	9.96433	9.87233	1.62624	1.68289	114.072	114.284			3.07277	3.09251	14.1733	14.2644	12.9921	12.6766	14.0358	13.6732	96.7959	96.9993			1.05663	1.0315	1.17848	1.17815			-0.6199	-27.6459	1.51	0.32	21.68	14.3576
2.05	2	50	5-10	2	6	1	3.26603		15.0647		10.4215		1.92149		116.778				3.1912		14.7196		12.9245		13.7959		98.7673				1.02345		1.18236				-0.6199	-27.6459	1.51	0.32	21.68	14.3576
2.05	2	50	5-10	3	6	1	3.057		14.1005		9.23119		1.50096		112.003				3.01356		13.9002		12.113		13.1879		95.4348				1.01441		1.17361				-0.6199	-27.6459	1.51	0.32	21.68	14.3576
2.1	2	100	0-5	1	6	2	11.6658	10.8421	41.4416	38.5154	21.282	19.5399	5.07147	5.05342	186.037	190.142	40.4913	38.1074	8.83012	8.30181	31.3681	29.4913	22.8854	20.8869	16.9226	16.2337	106.22	110.856	2.01242	2.30604	1.32114	1.30509	1.75143	1.71647	20.1206	16.7423	-0.9421	-27.6025	2.31	0.42	28.15	12.1861	153.294	230.481	99.1649	152.944	1.54585	1.55434	252.459
2.1	2	100	0-5	2	6	2	10.9012		38.7254		19.6276		5.15246		190.198		37.8383		8.27347		29.3907		20.6954		16.6851		110.116		2.53014		1.31761		1.72724		14.955		-0.9421	-27.6025	2.31	0.42	28.15	12.1861	323.071		206.723		1.56282		529.794
2.1	2	100	0-5	3	6	2	9.95919		35.379		17.7101		4.93632		194.192		35.9925		7.80185		27.7153		19.0799		15.0933		116.231		2.37555		1.27652		1.67074		15.1513		-0.9421	-27.6025	2.31	0.42	28.15	12.1861	215.078
2.1	2	100	5-10	1	6	2	4.08974	4.07109	14.5594	14.493	11.3484	11.4708	3.42268	3.53574	92.902	93.641			3.42771	3.44592	12.2026	12.2674	11.1196	11.2451	10.9583	11.1526	62.4704	63.4068			1.19314	1.18157	1.48714	1.47694			-0.871	-27.735	2.26	0.42	28.09	12.4292
2.1	2	100	5-10	2	6	2	3.8307		13.6373		10.8819		3.33086		93.6438				3.25003		11.57		10.5493		10.423		63.3449				1.17867		1.47832				-0.871	-27.735	2.26	0.42	28.09	12.4292
2.1	2	100	5-10	3	6	2	4.29283		15.2824		12.1823		3.85368		94.3773				3.66001		13.0296		12.0663		12.0765		64.405				1.1729		1.46537				-0.871	-27.735	2.26	0.42	28.09	12.4292
2.125	2	125	0-5	1	6	2	7.88366	7.85436	26.7606	26.6611	13.839	14.2908	4.69989	4.357	126.617	125.473	72.7202	76.851	6.36162	6.23976	21.5941	21.1805	13.1906	13.4253	13.2873	12.096	78.4746	77.2865	6.54631	7.29718	1.23925	1.259	1.61348	1.62348	11.1086	10.5813	-1.1318	-27.6325	2.45	0.47	29.46	12.0245	336.3	267.024	310.431	292.103	1.08333	0.826518	646.731
2.125	2	125	0-5	2	6	2	7.78899		26.4392		14.2627		4.31795		127.007		78.7561		6.10865		20.7354		13.3543		11.8479		77.5289		7.23644		1.27508		1.63818		10.8833		-1.1318	-27.6325	2.45	0.47	29.46	12.0245	308.801
2.125	2	125	0-5	3	6	2	7.89043		26.7835		14.7706		4.05315		122.794		79.0765		6.24902		21.2119		13.7309		11.1529		75.8559		8.10877		1.26267		1.61878		9.75197		-1.1318	-27.6325	2.45	0.47	29.46	12.0245	155.971		273.775		0.569704		429.746
2.125	2	125	5-10	1	6	2	3.3979	3.35117	11.5772	11.418	9.15091	9.18075	2.81836	2.98109	69.5549	69.3682			3.13364	3.12782	10.6768	10.657	9.56541	9.61587	9.44897	9.56145	52.2554	52.0818			1.08433	1.07141	1.33106	1.33188			-1.0122	-27.6631	2.39	0.47	29.35	12.2803
2.125	2	125	5-10	2	6	2	3.31838		11.3062		9.1436		3.12963		68.3273				3.10803		10.5895		9.60511		9.77754		51.4441				1.06768		1.32819				-1.0122	-27.6631	2.39	0.47	29.35	12.2803
2.125	2	125	5-10	3	6	2	3.33724		11.3705		9.24772		2.99528		70.2223				3.14179		10.7046		9.67707		9.45785		52.5459				1.06221		1.3364				-1.0122	-27.6631	2.39	0.47	29.35	12.2803
2.15	2	150	0-5	1	6	1	5.75247	6.51535	19.336	21.9003	9.33811	10.5768	2.04592	2.43315	95.9938	96.0149	60.9315	65.777	2.7388	3.02409	9.20604	10.165	7.23479	7.8176	7.34588	8.06896	40.2595	39.8259	1.34677	1.39003	2.10036	2.15209	2.38438	2.41088	45.2426	47.4139	-1.003	-27.6549	2.35	0.48	29.75	12.6596	280.995	221.197	135.163	170.878	2.07894	1.57982	416.158
2.15	2	150	0-5	2	6	1	6.22528		20.9253		10.5227		2.87536		98.4014		72.4861		2.85747		9.60494		7.50119		8.41184		40.4394		1.35754		2.1786		2.4333		53.3951		-1.003	-27.6549	2.35	0.48	29.75	12.6596	77.4419		247.488		0.312912		324.93
2.15	2	150	0-5	3	6	1	7.5683		25.4397		11.8695		2.37818		93.6495		63.9133		3.476		11.684		8.71683		8.44916		38.7788		1.46577		2.1773		2.41497		43.604		-1.003	-27.6549	2.35	0.48	29.75	12.6596	305.155		129.985		2.34762		435.14
2.15	2	150	5-10	1	6	1	3.88643	4.21958	13.1699	14.2988	9.07892	8.96193	2.08455	2.20863	79.0461	78.7725			2.37304	2.57369	8.04146	8.72142	8.268	8.75309	9.23931	10.0924	44.4906	43.3133			1.63775	1.638	1.77669	1.81933			-1.078	-27.6335	2.35	0.48	29.51	12.5574
2.15	2	150	5-10	2	6	1	4.87808		16.5303		9.80336		2.41441		79.1124				2.93855		9.9578		9.81859		11.4745		42.4669				1.66003		1.86292				-1.078	-27.6335	2.35	0.48	29.51	12.5574
2.15	2	150	5-10	3	6	1	3.89424		13.1963		8.0035		2.12691		78.1591				2.40949		8.165		8.17266		9.56334		42.9825				1.61621		1.81839				-1.078	-27.6335	2.35	0.48	29.51	12.5574
3.05	3	50	0-5	1	6	3	0.68316	0.754144	31.7749	35.0764	14.8085	16.8456	0.446867	0.504436	171.369	181.028			0.612515	0.72089	28.489	33.5297	21.4126	25.4871	22.6557	27.4589	126.672	146.795			1.11534	1.05912	1.35286	1.24832			-6.2714	-27.3	0.15		2.15	14.3333
3.05	3	50	0-5	2	6	3	0.666347		30.9929		14.8636		0.44512		162.592				0.611829		28.4571		22.6606		25.037		129.119				1.08911		1.25924				-6.2714	-27.3	0.15		2.15	14.3333
3.05	3	50	0-5	3	6	3	0.912924		42.4616		20.8646		0.62132		209.122				0.938326		43.6431		32.388		34.684		184.594				0.972929		1.13288				-6.2714	-27.3	0.15		2.15	14.3333
3.1	3	100	0-5	1	6	3	2.51678	2.51971	23.6207	23.6481	15.8864	15.4027	1.95926	1.8904	303.942	292.658			2.03628	1.9591	19.1111	18.3867	18.8266	17.7277	19.09	17.4283	212.978	195.007			1.23597	1.29661	1.42711	1.51162			1.3257	-27.835	0.56		10.655	19.0628
3.1	3	100	0-5	2	6	3	2.68143		25.1659		16.022		1.84474		287.763				2.18829		20.5377		19.1672		17.6064		201.891				1.22535		1.42534				1.3257	-27.835	0.56		10.655	19.0628
3.1	3	100	0-5	3	6	3	2.36092		22.1578		14.2996		1.86719		286.268				1.65272		15.5112		15.1893		15.5885		170.152				1.4285		1.68242				1.3257	-27.835	0.56		10.655	19.0628
3.125	3	125	0-5	1	6	3	2.90466	2.90407	10.3112	10.3091	6.40988	6.43387	2.56266	2.64908	105.878	107.258	38.2731	37.6648	2.02701	2.05564	7.19563	7.29726	6.42181	6.52726	7.46102	7.58908	60.9475	61.2727	5.31999	6.36956	1.43298	1.41323	1.7372	1.75082	7.19421	6.01223	-0.0788	-27.5858	1.74		28.17	16.1897	389.315	460.79	491.707	370.654	0.791762	2.3761	881.022
3.125	3	125	0-5	2	6	3	2.90449		10.3106		6.58449		2.75355		106.296		36.5801		2.02974		7.20534		6.49643		7.58772		59.8152		6.66533		1.43096		1.77708		5.48811		-0.0788	-27.5858	1.74		28.17	16.1897	508.438		93.8792		5.41588		602.318
3.125	3	125	0-5	3	6	3	2.90306		10.3055		6.30725		2.63102		109.601		38.1412		2.11016		7.49082		6.66355		7.71852		63.0553		7.12337		1.37575		1.73817		5.35437		-0.0788	-27.5858	1.74		28.17	16.1897	484.618		526.377		0.920666		1010.99
3.125	3	125	5-10	1	6	3	2.00383	2.03223	7.08819	7.18865	4.53222	4.63149	1.7545	1.79923	89.8392	89.8129			1.52325	1.51555	5.38822	5.36098	4.90799	4.83387	6.14771	5.9659	60.7813	58.2215			1.3155	1.34422	1.47807	1.54712			0.0393	-27.4421	1.73		28.27	16.341
3.125	3	125	5-10	2	6	3	2.04937		7.24926		4.9166		1.93439		87.4149				1.42243		5.0316		4.35465		5.31456		53.0276				1.44075		1.64848				0.0393	-27.4421	1.73		28.27	16.341
3.125	3	125	5-10	3	6	3	2.0435		7.22851		4.44566		1.70879		92.1844				1.60096		5.66311		5.23897		6.43542		60.8557				1.27642		1.5148				0.0393	-27.4421	1.73		28.27	16.341
3.15	3	150	0-5	1	6	2	6.75007	6.65746	22.6817	22.3705	12.944	13.065	3.40399	3.56111	110.301	112	72.3118	69.0295	4.93964	4.74519	16.5983	15.9449	11.2566	10.9353	9.73886	9.56897	60.1242	60.5466	14.4599	11.1166	1.36651	1.40387	1.83455	1.84955	5.00085	6.43242	-0.9552	-27.622	2.37	0.48	29.76	12.557	216.852	170.757	145.45	224.896	1.49091	0.993442	362.302
3.15	3	150	0-5	2	6	2	6.6133		22.2221		13.0268		3.86341		109.555		66.2215		4.69949		15.7913		10.7003		9.51999		59.4817		8.94697		1.40724		1.84183		7.40155		-0.9552	-27.622	2.37	0.48	29.76	12.557	150.947		304.342		0.495978		455.289
3.15	3	150	0-5	3	6	2	6.60901		22.2077		13.2241		3.41593		116.144		68.5552		4.59645		15.445		10.8488		9.44805		62.034		9.94295		1.43785		1.87226		6.89486		-0.9552	-27.622	2.37	0.48	29.76	12.557	144.472
3.15	3	150	5-10	1	6	2	3.42445	3.54046	11.5965	11.9894	9.54877	9.81832	2.77339	3.16962	75.1083	77.5735			3.02043	3.20921	10.2283	10.8676	9.50506	10.0561	9.02344	9.79404	53.261	55.1384			1.13377	1.10403	1.41019	1.40687			-0.9524	-27.6401	2.35	0.47	29.53	12.566
3.15	3	150	5-10	2	6	2	3.66775		12.4204		10.077		3.2358		80.2227				3.32611		11.2635		10.3592		9.98486		56.421				1.10271		1.42186				-0.9524	-27.6401	2.35	0.47	29.53	12.566
3.15	3	150	5-10	3	6	2	3.52918		11.9512		9.82923		3.49968		77.3894				3.28109		11.111		10.304		10.3738		55.7333				1.07561		1.38857				-0.9524	-27.6401	2.35	0.47	29.53	12.566
[truncated: 39 more columns]

## Sheet: means incubations
site	sediment depth	CO2 production	CH4 production	Q10 (CO2)	Q10 (CH4)	delta 15N	delta 13C	N	C	C/N	lignin	humic acids	phenolics	aromatics	fats, waxes, lipids	P	S	Mn	Fe	site	sediment depth	time	CO2 prod. / time step	CO2 amount	CH4 prod. / time step	CH4 amount	CO2/CH4	EACOM	EDCOM	EAC/EDC	EEC	hydrogenotrophic	H2 concentration	acetoclastic	acetate concentration	EACinorg	EACtot
	cm	µmol gC-1 d-1	µmol gC-1 d-1			‰	‰	%	%							ppm	ppm	ppm	%		cm		µmol gC-1 d-1	µmol	µmol gC-1 d-1	µmol		µmol e- gC-1	µmol e- gC-1		µmol e- gC-1	kJ mol-1	nmol L-1	kJ mol-1	µmol L-1	µmol e- gC-1	µmol e- gC-1
1.05	0-5	19.8185	15.3856	1.75184	3.6169	-0.4543	-27.8394	1.96	32.18	16.4184	0.415355	0.371562	0.370954	0.671395	0.358784	3161.7	12117.6	406.8	2.2401	1.05	0-5	0	33.0141	28.6895	20.036	2.87924	9.9841	365.178	200.058	1.80726	565.235	-29.2172	39.2329	-79.7952	664.837	23.4713	388.649
1.05	5-10	11.4372	9.91135	1.849	2.65335	-0.35	-27.7136	1.91	33.16	17.3613	0.427843	0.377643	0.381209	0.676719	0.369652	3108.6	12240	369.9	2.1321	1.05	5-10	0	15.8405	17.4022	12.5937	3.35312	5.26192					-10.4767	2.29858
1.1	0-5	23.4702	19.169			-0.4558	-27.4114	2	28.46	14.23	0.409233	0.354557	0.349835	0.655793	0.352011	3390.3	10555.2	398.7	2.412	1.1	0-5	0	38.924	5.64474	27.2654	0.272857	22.7362	229.793	249.872	1.0608	479.666			-89.0989	503.889	185.494	415.288
1.1	5-10	9.29202	8.68066			-0.4647	-27.4358	1.91	28.19	14.7592	0.415868	0.360204	0.358767	0.658631	0.35905	3352.5	10640.7	391.5	2.4084	1.1	5-10	0	12.4955	3.78225	9.82006	0.466692	8.23148
1.125	0-5	19.9637	11.8838			-0.7306	-27.6743	2.2	28.41	12.9136	0.379342	0.340139	0.337866	0.662329	0.361527	3645	10137.6	442.8	2.6883	1.125	0-5	0	32.0289	2.41982	15.2876	0.105771	22.9171	218.693	320.442	0.744169	539.135			-92.7951	388.366	200.52	419.213
1.125	5-10	10.3542	8.39095			-0.8055	-27.6948	2.17	28.43	13.1014	0.383496	0.343106	0.342319	0.658866	0.365772	3690	10640.7	441.9	2.6469	1.125	5-10	0	14.1124	2.76806	9.04614	0.102395	62.135
1.15	0-5	19.6698	15.2557			-1.3942	-27.4254	2.36	25.89	10.9703	0	0.325855	0.327773	0.651299	0.364687	3895.2	10237.5	443.7	2.8215	1.15	0-5	0	30.6869	13.1276	17.4649	0.761887	17.2782	431.791	462.689	0.928911	894.48	-34.6557	57.0907	-83.4936	349.804	33.802	465.593
1.15	5-10	14.0255	10.8139			-1.3576	-27.4073	2.36	26.31	11.1483	0.382753	0.332134	0.335204	0.653558	0.366558	3928.5	10356.3	441.9	2.8053	1.15	5-10	0	20.8455	9.90953	12.0085	0.96224	10.4106						0
2.05	0-5	33.1553	18.1913			-0.7943	-27.5401	1.98	26.3	13.2828	0	0.301248	0.297625	0.58211	0.304352	3524.4	7987.5	426.6	2.5641	2.05	0-5	0	52.6059	2.62351	18.2806	1.16054	2.35059	294.864	243.272	1.33973	538.136			-87.1641	468.268	195.413	490.276
2.05	5-10	14.7137	14.2644			-0.6199	-27.6459	1.51	21.68	14.3576	0	0.265219	0.259243	0.496459	0.260105	3221.1	6365.7	428.4	2.5551	2.05	5-10	0	20.0374	13.0148	16.0621	1.36129	19.1254
2.1	0-5	38.5154	29.4913			-0.9421	-27.6025	2.31	28.15	12.1861	0	0.313182	0.311648	0.601455	0.318594	3947.5	9102.5	460	2.81	2.1	0-5	0	70.6739	34.9332	38.6839	1.68067	20.8531	388.618	149.543	2.65821	538.161	-31.3954	40.2263	-77.5188	219.739	36.3819	425
2.1	5-10	14.493	12.2674			-0.871	-27.735	2.26	28.09	12.4292	0	0.340363	0.343504	0.64533	0.363715	3833.1	9116.1	414	2.5434	2.1	5-10	0	20.3404	16.4117	13.2601	2.03235	8.09435					-7.40522	1.4706
2.125	0-5	26.6611	21.1805			-1.1318	-27.6325	2.45	29.46	12.0245	0.378189	0.324411	0.326916	0.6508	0.357136	3929.4	9932.4	441	2.8251	2.125	0-5	0	48.3029	23.4483	31.8724	1.63475	14.4089	335.963	270.683	1.23587	606.646	-33.6542	55.1002	-81.5787	648.987	19.8246	355.788
2.125	5-10	11.418	10.657			-1.0122	-27.6631	2.39	29.35	12.2803	0	0.318245	0.322589	0.637358	0.351289	4088.7	10197.9	446.4	2.7891	2.125	5-10	0	15.4816	11.9707	11.6727	1.63372	7.34539						0
2.15	0-5	21.9003	10.165	1.88498	7.10516	-1.003	-27.6549	2.35	29.75	12.6596	0.366056	0.327533	0.327652	0.655857	0.355152	3919.5	10122.3	450.9	2.8512	2.15	0-5	0	35.1256	1.15557	12.589	0.112751	10.3988	228.129	334.386	0.929026	562.515			-96.3168	795.229	218.013	446.142
2.15	5-10	14.2988	8.72142	1.55862	3.65541	-1.078	-27.6335	2.35	29.51	12.5574	0.362147	0.319355	0.319643	0.644441	0.352393	3975.3	10299.6	459	2.8341	2.15	5-10	0	20.7833	2.76557	8.92975	0.114651	24.0114
3.05	0-5	35.0764	33.5297			-6.2714	-27.3	0.15	2.15	14.3333	0	0.0393172	0.0184776	0.210333	0.177946	3639	1310	1160	7.012	3.05	0-5	0	53.2681	19.9365	40.3645	2.54265	8.0592					-38.2188	99.1915
3.1	0-5	23.6481	18.3867	2.19151	11.3677	1.3257	-27.835	0.56	10.655	19.0628	0	0.244556	0.213831	0.490875	0.252722	5087	2604	867.5	5.2505	3.1	0-5	0	30.3329	37.4897	17.9249	2.1498	17.8323					-36.2841	68.0047
3.125	0-5	10.3091	7.29726	1.58848	3.13327	-0.0788	-27.5858	1.74	28.17	16.1897	0.43214	0.472516	0.462777	0.799899	0.470945	2950.2	9550.8	476.1	2.565	3.125	0-5	0	14.7137	15.5544	8.02858	1.24914	12.4532	545.709	404.47	1.34762	950.179	-22.2876	20.4288	-81.735	340.654	68.8753	614.584
3.125	5-10	7.18865	5.36098	1.96982	3.45319	0.0393	-27.4421	1.73	28.27	16.341	0.437459	0.491198	0.480062	0.825393	0.491636	2984.4	9766.8	483.3	2.5425	3.125	5-10	0	10.0674	8.85867	5.94245	1.16578	7.50916						0
3.15	0-5	22.3705	15.9449			-0.9552	-27.622	2.37	29.76	12.557	0	0.321533	0.321954	0.643141	0.350629	3951	10197.9	450.9	2.8683	3.15	0-5	0	38.9968	23.0615	22.9292	1.52802	15.3623	277.056	192.473	1.45505	469.529	-32.3388	47.0681	-82.3423	795.392	59.3921	336.448
3.15	5-10	11.9894	10.8676			-0.9524	-27.6401	2.35	29.53	12.566	0.381072	0.334921	0.336799	0.658057	0.375794	3951.9	10024.2	453.6	2.826	3.15	5-10	0	16.1459	14.1357	11.5643	1.45481	9.78084						0
																				1.05	0-5	6	12.6924	147.518	12.0937	90.1656	1.63682	349.846	183.436	1.86284	533.282	-51.9566	601.902	-66.8187	556.176	61.5526	411.399
																				1.05	5-10	6	9.26302	106.479	7.62594	73.5994	1.47532					-36.3613	186.099
																				1.1	0-5	6	10.0708	131.496	11.4115	93.7696	1.40261	275.661	283.471	1.32989	559.132	-53.7222	736.43	-67.8728	789.837	73.9785	349.639
																				1.1	5-10	6	6.55944	65.7665	7.65203	55.1751	1.19284					-42.6606	294.504
																				1.125	0-5	6	9.73201	101.976	8.45118	53.1487	1.91876	198.29	228.028	1.12243	426.318	-54.6389	744.433	-69.9915	833.301	51.5512	249.841
																				1.125	5-10	6	7.4012	64.5251	7.86171	47.1348	1.36888					-46.9268	377.878
																				1.15	0-5	6	9.7172	87.8402	12.8852	53.5163	1.6413	382.435	325.414	1.48278	707.849	-55.8811	908.347	-70.4234	851.275	87.184	469.619
																				1.15	5-10	6	8.1745	78.0082	9.58515	48.9468	1.60021					-31.1423	49.6781
																				2.05	0-5	6	17.0458	172.897	17.7802	85.1998	2.03169	310.811	254.129	1.46907	564.94	-52.9693	645.197	-68.3184	1123.66	43.8612	354.672
																				2.05	5-10	6	9.87233	114.284	12.6766	96.9993	1.17815					-51.8051	637.746
																				2.1	0-5	6	19.5399	190.142	20.8869	110.856	1.71647	230.481	152.944	1.55434	391.127	-53.7203	699.686	-66.3702	731.34	62.2955	292.777
																				2.1	5-10	6	11.4708	93.641	11.2451	63.4068	1.47694					-37.6704	297.201
																				2.125	0-5	6	14.2908	125.473	13.4253	77.2865	1.62348	267.024	292.103	0.826518	538.239	-49.9063	488.92	-69.5511	1212.71	63.4833	330.507
																				2.125	5-10	6	9.18075	69.3682	9.61587	52.0818	1.33188					-46.0885	349.827
																				2.15	0-5	6	10.5768	96.0149	7.8176	39.8259	2.41088	221.197	170.878	1.57982	392.076	-53.9967	659.889	-71.624	1114.02	65.5372	286.735
																				2.15	5-10	6	8.96193	78.7725	8.75309	43.3133	1.81933					-50.9996	535.929
																				3.05	0-5	6	16.8456	181.028	25.4871	146.795	1.24832					-52.9114	717.743
																				3.1	0-5	6	15.4027	292.658	17.7277	195.007	1.51162					-57.5321	1064.01
																				3.125	0-5	6	6.43387	107.258	6.52726	61.2727	1.75082	460.79	370.654	2.3761	831.445	-53.8361	708.741	-68.2419	488.856	51.5042	512.295
																				3.125	5-10	6	4.63149	89.8129	4.83387	58.2215	1.54712					-51.741	396.319
																				3.15	0-5	6	13.065	112	10.9353	60.5466	1.84955	170.757	224.896	0.993442	408.795	-51.7039	566.095	-70.1478	1087.22	56.1934	226.951
																				3.15	5-10	6	9.81832	77.5735	10.0561	55.1384	1.40687					-46.5762	382.324

## Sheet: production rates
		CO2							CH4
		t0-t1	t1-t2	t2-t3	t3-t4	t4-t5	t5-t6		t0-t1	t1-t2	t2-t3	t3-t4	t4-t5	t5-t6
1.5	0 - 5	52.8066	34.399	18.0361	12.9463	10.9196	12.0856		13.0574	22.2582	19.9454	14.6032	10.1938	12.2083
1.5	0 - 5	50.0156	33.2498	19.6844	12.97	12.3527	12.7148		10.8356	20.0406	19.3808	13.2276	10.541	11.9077
1.5	0 - 5	40.9647	38.5929	20.8139	14.7829	11.034	14.2543		10.9977	21.4719	20.9657	13.8725	10.3358	11.7162
1.5	5 - 10	23.9971	15.7433	11.2465	9.45915	8.02597	9.95435		6.88659	11.337	13.156	9.7479	7.54332	8.84196
1.5	5 - 10	22.2554	15.1061	9.35721	9.25526	5.98996	13.8257		6.76261	11.2185	11.8218	9.8045	5.78616	-0.204647
1.5	5 - 10	30.2699	17.4227	12.1498	9.36519	7.66659	9.5474		13.2982	16.0575	15.0575	10.6219	7.55793	8.84396
1.1	0 - 5	95.2467	52.1382	25.3914	20.8228	6.92554	7.14287		20.3916	30.1293	26.8514	13.4246	11.0074	11.1171
1.1	0 - 5	106.505	49.8866	24.4022	21.8244	4.94266	5.53338		18.3584	28.8741	25.2957	14.5433	9.5372	9.85239
1.1	0 - 5	119.301	56.4914	25.7668	21.2176	3.74657	8.25518		26.036	33.0616	27.5827	13.5364	10.5795	11.2203
1.1	5 - 10	35.2026	17.5163	6.7728	10.2891	4.94676	5.76723		10.4489	10.2332	8.39693	8.46183	6.94491	7.89718
1.1	5 - 10	40.9428	18.7857	7.91284	11.017	5.74982	5.03939		13.553	12.0951	9.93178	9.39092	7.12105	8.22002
1.1	5 - 10	37.4026	16.8523	7.40621	11.3347	5.51671	3.29332		12.0938	10.5872	8.95305	7.92117	5.90137	7.70206
1.125	0 - 5	92.0193	41.1378	18.5516	18.7796	5.6824	6.62289		9.84923	15.3937	14.4902	9.34239	7.47992	7.64925
1.125	0 - 5	101.832	43.8432	19.6112	19.1083	4.95607	8.57635		10.3597	16.6245	16.0805	9.79814	7.85965	9.24037
1.125	0 - 5	97.6437	46.6975	20.238	20.7926	4.32478	7.20563		9.0217	16.6379	16.1705	10.5141	7.4581	7.91867
1.125	5 - 10	40.2203	21.6867	9.00972	11.9735	4.7339	6.82107		8.51329	9.94033	9.02237	8.56495	7.36089	8.4047
1.125	5 - 10	36.0976	20.2611	8.43151	8.56516	9.07202	5.96111		8.80064	9.40888	8.58277	7.23321	8.83304	7.77318
1.125	5 - 10	40.4636	19.759	8.21466	11.4434	4.96959	5.96922		9.64658	9.93352	8.6969	7.8329	6.28475	8.40346
1.15	0 - 5	94.6913	29.2138	23.7005	13.7529	1.22946	14.7027		14.8991	16.9709	17.4683	14.4783	9.68207	14.458
1.15	0 - 5	94.6547	30.8052	23.7166	14.7813	1.08296	14.6164		14.8984	17.5069	18.0229	14.6726	10.1823	15.0087
1.15	0 - 5	85.5099	30.8692	23.1771	13.8673	3.57241	15.4726		15.2554	17.839	17.8156	13.0869	10.5549	15.1687
1.15	5 - 10	61.7039	23.0676	16.2557	9.59098	3.8188	11.6838		11.4291	11.8353	13.0881	9.87213	8.54326	11.7517
1.15	5 - 10	61.2555	23.0263	15.463	10.1132	2.17695	12.9548		10.0938	11.0749	11.3626	9.36302	7.09242	9.90789
1.15	5 - 10	57.0172	20.6696	15.034	10.8419	3.40311	11.0881		10.7672	11.6629	12.6039	10.3343	7.93724	11.4346
2.5	0 - 5	191.458	67.2101	27.6596	37.4138	7.74537	10.564		15.8106	15.3978	18.3205	19.1794	15.9639	16.5369
2.5	0 - 5	189.651	65.957	33.0923	35.3946	8.14334	12.7499		13.2671	16.0155	20.0525	19.2217	15.6601	18.4147
2.5	0 - 5	178.743	65.5026	32.4808	27.1349	9.40838	18.6997		11.4142	16.6356	20.9079	17.3861	17.1542	20.9653
2.5	5 - 10	43.7265	27.7442	14.6109	16.3712	7.93514	7.50109		12.7883	16.4263	15.4673	13.2131	11.7067	14.0358
2.5	5 - 10	40.8643	27.7287	14.7079	16.0285	8.00241	8.86296		15.2447	16.6531	16.7669	13.5569	11.524	13.7959
2.5	5 - 10	41.0436	27.0353	13.9721	14.1772	8.10231	6.92322		15.9428	16.8157	15.7739	11.747	11.223	13.1879
2.1	0 - 5	113.122	79.1698	46.9067	30.5651	14.9784	18.0159		15.5357	39.3221	51.3162	33.0404	18.4935	16.9226
2.1	0 - 5	104.759	74.8175	45.1929	27.0867	13.2003	18.3036		15.7718	38.6897	49.2065	29.3445	15.8358	16.6851
2.1	0 - 5	107.471	68.536	40.0077	24.0538	11.2469	17.5358		16.3744	37.7651	45.9621	27.093	14.8617	15.0933
2.1	5 - 10	38.7026	20.6568	13.1447	12.4046	9.36572	12.1847		8.66579	13.1916	15.3802	12.3062	10.0455	10.9583
2.1	5 - 10	35.6555	19.2874	11.328	12.0446	8.64135	11.8578		8.20503	12.883	13.7324	11.9648	9.19885	10.423
2.1	5 - 10	38.0443	21.1283	14.1326	13.4564	9.23768	13.7191		9.5685	13.9999	15.5854	13.4488	10.6073	12.0765
2.125	0 - 5	73.4088	55.6291	24.4634	18.4389	6.80495	15.9535		16.0773	36.7899	32.1036	18.3709	7.66239	13.2873
2.125	0 - 5	65.7485	51.4193	28.1904	19.1114	8.77003	14.657		13.5384	32.6222	32.322	18.1088	9.95161	11.8479
2.125	0 - 5	66.0244	50.5781	28.8315	20.385	9.94967	13.7582		14.0451	33.559	32.1341	18.5408	11.3926	11.1529
2.125	5 - 10	30.0054	15.523	10.8798	10.8417	6.90644	9.60257		8.45897	11.7258	13.2225	11.2854	7.8855	9.44897
2.125	5 - 10	27.5495	15.0351	10.8947	10.3664	6.27074	10.6631		7.03339	11.6829	13.1425	10.9336	8.03271	9.77754
2.125	5 - 10	28.7373	14.5716	11.2613	10.45	6.98491	10.2054		7.72206	11.7142	13.4609	10.8558	8.67185	9.45785
2.15	0 - 5	111.407	40.9277	17.8811	19.5563	4.52137	6.87703		9.22443	11.3289	11.4284	7.78509	6.71302	7.34588
2.15	0 - 5	109.369	46.3082	19.1577	21.9192	3.11808	9.66507		9.57445	12.5913	11.8856	7.98388	6.16775	8.41184
2.15	0 - 5	126.765	48.4286	27.1631	25.8856	5.80079	7.9939		11.9384	14.3111	15.1109	9.62123	8.34417	8.44916
2.15	5 - 10	56.55	29.2858	8.75303	17.8084	4.86972	7.06389		6.9009	8.77212	7.6699	8.35897	7.1555	9.23931
2.15	5 - 10	83.9559	35.3593	13.4209	18.4167	5.25543	8.18167		9.50126	11.2062	10.2909	8.70072	8.85222	11.4745
2.15	5 - 10	67.1747	28.032	10.6055	14.6585	3.99757	7.20742		8.08488	9.10537	8.18693	7.57159	7.11425	9.56334
3.5	0 - 5	107.093	48.885	41.006	29.0222	1.8513	20.7845		26.3225	31.9315	35.8527	28.3487	16.9488	22.6557
3.5	0 - 5	116.795	49.3374	38.3624	26.2363	3.3205	20.7032		30.0258	35.6998	33.0453	28.4174	17.4616	25.037
3.5	0 - 5	143.688	68.2918	52.8194	37.6793	4.46479	28.8986		44.5855	57.8648	52.8534	40.6377	26.1703	34.684
3.1	0 - 5	46.3278	23.9695	30.293	26.6219	8.33533	18.3882		8.20256	13.2134	21.856	20.8363	17.6407	19.09
3.1	0 - 5	47.3891	24.52	33.1705	30.863	7.99106	17.3134		8.62332	14.0073	24.1299	24.7656	18.4132	17.6064
3.1	0 - 5	49.5216	24.0576	28.647	22.5904	7.03198	17.5241		6.46128	9.77245	18.1598	16.9839	13.9481	15.5885
3.125	0 - 5	40.0955	13.2921	12.2206	7.66521	2.86611	9.09714		6.49857	7.1425	8.38202	6.62153	5.17836	7.46102
3.125	0 - 5	39.0114	14.3908	11.7728	8.0842	2.37321	9.77477		6.3384	7.48756	8.26498	6.46377	5.29841	7.58772
3.125	0 - 5	37.5784	14.6589	12.162	7.64248	2.34431	9.3398		6.73267	7.83486	8.62901	6.89045	5.39052	7.71852
3.125	5 - 10	24.7164	10.3413	8.06908	5.4601	2.25983	6.20621		6.36762	5.82253	6.0026	4.70096	3.62253	6.14771
3.125	5 - 10	25.8933	11.3052	7.62328	5.98611	2.3013	6.84256		6.18027	5.49379	5.78508	4.49397	3.22615	5.31456
3.125	5 - 10	27.3756	9.13819	8.54286	6.30213	1.84404	6.04454		6.31732	5.37869	6.36804	5.48117	3.80192	6.43542
3.15	0 - 5	70.0525	43.598	18.2838	17.0612	10.2083	11.4381		13.6773	26.0619	23.2513	14.2297	9.73207	9.73886
3.15	0 - 5	60.9222	40.7255	21.4213	17.5609	8.32396	12.9819		11.9898	24.6268	22.58	13.7595	8.73208	9.51999
3.15	0 - 5	65.8854	40.6056	19.3884	17.251	10.8345	11.4782		11.3303	23.2227	21.702	13.9747	9.04156	9.44805
3.15	5 - 10	31.6266	14.99	9.17721	11.7835	7.37205	9.39177		6.77743	10.9528	11.947	10.9022	8.54591	9.02344
3.15	5 - 10	33.714	16.4551	10.9314	11.4211	7.74612	10.9577		7.33254	12.0432	13.7628	11.8818	9.15622	9.98486
3.15	5 - 10	33.6165	15.4421	10.9858	10.637	6.86471	11.8513		7.4997	12.0689	13.561	10.9374	9.56745	10.3738
MW	0 - 5	91.4855	44.6706	26.4907	21.1353	6.78895	13.3244		14.37	22.7973	23.8757	16.7418	11.5991	13.5754
SD	0 - 5	40.2871	16.768	9.6905	7.59016	3.59444	4.99824		7.44148	11.2586	11.4692	7.86433	4.68873	5.77674
MW	5 - 10	39.8594	19.6319	11.0098	11.3954	6.00092	8.90574		9.36284	11.3773	11.5593	9.71631	7.89479	9.32316
SD	5 - 10	14.1802	5.94901	2.69062	3.06329	2.20451	2.74461		2.66624	2.84598	3.13111	2.34352	2.09565	2.71772

## Sheet: mesocosms
ID	site	transect	date_CH4	date_LG	CH4-flux LG	CO2-flux LG	CH4_flux_LG	CO2_flux_LG	CO2_flux_LG_MW	CH4_flux_man	CH4_flux_diff	CH4_flux_diff_MW	CH4_flux_ebu	CH4_diff_head	Bubbles	Bubble_events	delta_stock_O_CH4	delta_stock_M_CH4	delta_stock_U_CH4	delta_stock_O_CO2	delta_stock_M_CO2	delta_stock_U_CO2	Lignin	Phenolics + Aliphateics	Humics	aromatics	fats+waxes	clay	silt_fine	silt_medium	silt_coarse	silt_total	sand_fine	sand_medium	sand_coarse	sand_tot	P	S	Mn	Fe	Mg	K	N	C	C/N	Ammonia	Phosphate	iron_tot	chloride
					µmol m-2 s-1	µmol m-2 s-1	mmol m-2 d-1	mmol m-2 d-1	mmol m-2 d-1	mmol m-2 d-1	mmol m-2 d-1	mmol m-2 d-1	mmol m-2 d-1	ppm	%	no.	mmol 0.05 m-3 d-1	mmol 0.05 m-3 d-1	mmol 0.05 m-3 d-1	mmol 0.05 m-3 d-1	mmol 0.05 m-3 d-1	mmol 0.05 m-3 d-1	1230-1265	1371	1426	1600-1650	2850	< 2 mm	2-6 mm	6-20 mm	20-63 mm		63-200 mm	200-630 mm	630-2000 mm		ppm	ppm	ppm	mass%	ppm	mass%	%	%		mg L-1	mg L-1	mg L-1	mg L-1
11	1.50M	1	2018-02-27 09:50:00	03/21/2018 14:53:44.579	0.000265902	0.0944218	0.022974	8.15805	15.6752	0.0228824	0.00648653	0.018116	0.0163958	4.33432	71.6527		0.643725	0.401318		-6.46904	2.9024		0.424686	0.360173	0.365109	0.634319	0.368248	43	6.17	27.5	19	52.67	3	1.33	0	4.33	3416	12183	424	2.561	4836	0.942	1.96	28.72	14.6531	0.084516	0.342234	35.1874	10.92
11	1.50M	1	2018-03-05 10:05:00	03/21/2018 15:02:44.823	0.000175142	0.0762222	0.0151322	6.5856		0.0492479	0.0492479		0	9.42675	0		0.357285	0.315456		4.2449	6.3096		0.424686	0.360173	0.365109	0.634319	0.368248	43	6.17	27.5	19	52.67	3	1.33	0	4.33	3416	12183	424	2.561	4836	0.942	1.96	28.72	14.6531	0.084516	0.342234	35.1874	10.92
11	1.50M	1	2018-03-22 13:00:00	03/22/2018 09:47:44.595	0.00308087	0.31131	0.266187	26.8972		0.00920074	0.00920074		0	1.58207	0		0.561737	0.1908		18.7053	25.6851		0.424686	0.360173	0.365109	0.634319	0.368248	43	6.17	27.5	19	52.67	3	1.33	0	4.33	3416	12183	424	2.561	4836	0.942	1.96	28.72	14.6531	0.084516	0.342234	35.1874	10.92
11	1.50M	1	2018-04-03 10:45:00	03/22/2018 09:59:44.618	0.00316513	0.224791	0.273468	19.4219		0.0460463	0.00752898		0.0385173	8.66119	83.6491		0.420756	0.678387		-9.04358	-3.89099		0.424686	0.360173	0.365109	0.634319	0.368248	43	6.17	27.5	19	52.67	3	1.33	0	4.33	3416	12183	424	2.561	4836	0.942	1.96	28.72	14.6531	0.084516	0.342234	35.1874	10.92
11	1.50M	1		03/22/2018 10:11:44.650	0	0.200382	0	17.313															0.424686	0.360173	0.365109	0.634319	0.368248	43	6.17	27.5	19	52.67	3	1.33	0	4.33	3416	12183	424	2.561	4836	0.942	1.96	28.72	14.6531	0.084516	0.342234	35.1874	10.92
12	1.50R	1	2018-02-14 10:15:00	03/21/2018 15:10:44.493	7.22956e-05	0.0575286	0.00624634	4.97047	13.3718	0.00200994	0.00200994	0.00544812	0	0.41119	0	3	-0.696873	0.389445	0.881491	-2.08058	-4.30069	-1.76203						43	6.17	27.5	19	52.67	3	1.33	0	4.33										0.109228	0.306871	29.7267	0.629
12	1.50R	1	2018-02-26 08:40:00	03/21/2018 15:20:44.335	0.000105776	0.0824817	0.00913907	7.12642		0.0125717	0.0125717		0	2.5088	0		-0.134854	0.356638	1.30987	-5.10804	3.37765	3.21884						43	6.17	27.5	19	52.67	3	1.33	0	4.33										0.109228	0.306871	29.7267	0.629
12	1.50R	1	2018-03-22 13:00:00	03/22/2018 10:21:44.520	0	0.240747	0	20.8006		0.0174008	0.000225062		0.0171757	2.99742	98.7066		2.07426	-0.00593744	0.706179	-12.9365	14.1483	10.4068						43	6.17	27.5	19	52.67	3	1.33	0	4.33										0.109228	0.306871	29.7267	0.629
12	1.50R	1	2018-04-03 10:45:00	03/22/2018 10:27:44.030	0	0.160905	0	13.9022		0.00698575	0.00698575		0	1.31199	0			0.269882			-3.72707							43	6.17	27.5	19	52.67	3	1.33	0	4.33										0.109228	0.306871	29.7267	0.629
12	1.50R	1		03/22/2018 10:34:14.801	0	0.232169	0	20.0594														2.48557						43	6.17	27.5	19	52.67	3	1.33	0	4.33										0.109228	0.306871	29.7267	0.629
13	1.50R²	1	2018-02-14 10:15:00	03/22/2018 10:57:44.522	0	0.215517	0	18.6207	20.2576	0.0120723	0.0120723	0.0126003	0	3.5942	0								0.447048	0.37934	0.38565	0.62609	0.384647	43	6.17	27.5	19	52.67	3	1.33	0	4.33	3102	11905	415	2.306	3716	0.849	1.84	30.57	16.6141	0.110958	0.328303	26.1495	2.904
13	1.50R²	1	2018-02-26 08:40:00	03/22/2018 11:07:44.373	0	0.258186	0	22.3072		0.0132415	0.0132415		0	2.66937	0			0.438621			8.35652		0.447048	0.37934	0.38565	0.62609	0.384647	43	6.17	27.5	19	52.67	3	1.33	0	4.33	3102	11905	415	2.306	3716	0.849	1.84	30.57	16.6141	0.110958	0.328303	26.1495	2.904
13	1.50R²	1	2018-03-22 13:00:00	03/22/2018 11:17:44.203	0	0.229685	0	19.8448		0.00896644	0.00896644		0	1.5803	0			0.552163	0.300096		-1.34894	10.0268	0.447048	0.37934	0.38565	0.62609	0.384647	43	6.17	27.5	19	52.67	3	1.33	0	4.33	3102	11905	415	2.306	3716	0.849	1.84	30.57	16.6141	0.110958	0.328303	26.1495	2.904
13	1.50R²	1	2018-04-03 10:45:00							0.0161209	0.0161209		0	3.05932	0		0.464359	0.495747	0.192463	1.58578	-8.10204	-5.51432	0.447048	0.37934	0.38565	0.62609	0.384647	43	6.17	27.5	19	52.67	3	1.33	0	4.33	3102	11905	415	2.306	3716	0.849	1.84	30.57	16.6141	0.110958	0.328303	26.1495	2.904
21	2.100L	2	2018-02-07 10:25:00	03/22/2018 11:29:44.242	0	0.106167	0	9.17283	11.0343	0.0715619	0.00728257	0.106783	0.0642793	15.5954	89.8234		0.411677			6.40251			0	0.308379	0.306918	0.579477	0.336124	45.71	10.2	20.82	22.45	53.47	0.82	0	0	0.82	3890	8942	444	2.753	5640	1.104	2.08	26.59	12.7837	0.128751	0.261059	2.2842	3.098
21	2.100L	2	2018-02-14 10:15:00	03/22/2018 11:37:44.891	0	0.162538	0	14.0433		1.72065	0.0150011		1.70565	351.586	99.1282		0.911271	0.601255		-17.7473	-14.4695		0	0.308379	0.306918	0.579477	0.336124	45.71	10.2	20.82	22.45	53.47	0.82	0	0	0.82	3890	8942	444	2.753	5640	1.104	2.08	26.59	12.7837	0.128751	0.261059	2.2842	3.098
21	2.100L	2	2018-02-26 08:40:00	03/22/2018 11:47:44.738	0	0.114429	0	9.88671		0.0121316	0.0121316		0	2.41943	0		0.651228	0.951404		5.38283	15.1417		0	0.308379	0.306918	0.579477	0.336124	45.71	10.2	20.82	22.45	53.47	0.82	0	0	0.82	3890	8942	444	2.753	5640	1.104	2.08	26.59	12.7837	0.128751	0.261059	2.2842	3.098
21	2.100L	2	2018-03-22 13:00:00							0.490877	0.490877		0	691.023	0		0.344637	0.480042		6.69037	21.1257		0	0.308379	0.306918	0.579477	0.336124	45.71	10.2	20.82	22.45	53.47	0.82	0	0	0.82	3890	8942	444	2.753	5640	1.104	2.08	26.59	12.7837	0.128751	0.261059	2.2842	3.098
21	2.100L	2	2018-04-03 10:45:00							1.53158	0.00862255		1.52295	288.086	99.437		0.318925	0.553664		-0.755523	-5.52387		0	0.308379	0.306918	0.579477	0.336124	45.71	10.2	20.82	22.45	53.47	0.82	0	0	0.82	3890	8942	444	2.753	5640	1.104	2.08	26.59	12.7837	0.128751	0.261059	2.2842	3.098
22	2.100M	2	2018-02-12 10:45:00	03/22/2018 11:58:44.216	0.0018888	0.167439	0.163192	14.4667	15.0652	0.0136647	0.0136647	0.192952	0	2.63995	0	9	0.166984			7.64252								45.71	10.2	20.82	22.45	53.47	0.82	0	0	0.82										0.0811798	0.376258	50.4318	17.039
22	2.100M	2	2018-03-06 09:25:00	03/22/2018 12:31:44.534	0.00320868	0.179719	0.27723	15.5277		9.79573	0.0381004		9.75763	1887.81	99.6111		0.257035	0.094967	0.206087	10.6096	10.0486	18.1929						45.71	10.2	20.82	22.45	53.47	0.82	0	0	0.82										0.0811798	0.376258	50.4318	17.039
22	2.100M	2	2018-03-22 13:00:00	03/22/2018 12:39:44.237	0.0032986	0.175939	0.284999	15.2012		2.55361	0.695681		1.85793	439.88	72.757		0.428249	0.244044	0.411352	22.1632	-6.63397	-5.29512						45.71	10.2	20.82	22.45	53.47	0.82	0	0	0.82										0.0811798	0.376258	50.4318	17.039
22	2.100M	2	2018-04-03 10:45:00							0.510278	0.0243628		0.485915	95.9819	95.2256		0.357028	0.295394	0.331009	-6.37485	-6.14376	-2.58447						45.71	10.2	20.82	22.45	53.47	0.82	0	0	0.82										0.0811798	0.376258	50.4318	17.039
23	2.100R	2	2018-02-20 09:45:00	03/21/2018 12:23:44.127	-0.0016298	0.218137	-0.140814	18.847	18.4549	0.0138262	0.0138262	0.0618014	0	2.63384	0		1.29973	0.206726	0.753645	5.16161	0.299874	9.90761	0	0.28739	0.28667	0.565705	0.30692	45.71	10.2	20.82	22.45	53.47	0.82	0	0	0.82	4005	9263	476	2.867	5721	1.131	2.18	27.28	12.5138	0.0830333	0.312764	50.5456	3.579
23	2.100R	2	2018-03-06 09:25:00	03/21/2018 12:30:44.204	0.0224059	0.24321	1.93587	21.0134		0.116581	0.0229945		0.0935863	22.4672	80.2759		0.219187	0.296067	0.388023	10.6958	14.4587	7.77112	0	0.28739	0.28667	0.565705	0.30692	45.71	10.2	20.82	22.45	53.47	0.82	0	0	0.82	4005	9263	476	2.867	5721	1.131	2.18	27.28	12.5138	0.0830333	0.312764	50.5456	3.579
23	2.100R	2	2018-03-22 13:00:00	03/22/2018 12:49:44.080	0	0.246551	0	21.302		1.64775	0.0562902		1.59146	283.838	96.5838		0.131513	-0.0960962	0.0601019	-5.0055	0.541096	35.3313	0	0.28739	0.28667	0.565705	0.30692	45.71	10.2	20.82	22.45	53.47	0.82	0	0	0.82	4005	9263	476	2.867	5721	1.131	2.18	27.28	12.5138	0.0830333	0.312764	50.5456	3.579
23	2.100R	2	2018-04-03 10:45:00	03/22/2018 12:59:24.427	-1.29226	0.184387		15.9311		1.14481	0.154095		0.990713	215.335	86.5397		0.168974	0.409952	1.50735	-2.40141	-10.7772	-75.9992	0	0.28739	0.28667	0.565705	0.30692	45.71	10.2	20.82	22.45	53.47	0.82	0	0	0.82	4005	9263	476	2.867	5721	1.131	2.18	27.28	12.5138	0.0830333	0.312764	50.5456	3.579
23	2.100R	2		03/22/2018 13:08:44.222	0.0420366	0.175709	3.63196	15.1812															0	0.28739	0.28667	0.565705	0.30692	45.71	10.2	20.82	22.45	53.47	0.82	0	0	0.82	4005	9263	476	2.867	5721	1.131	2.18	27.28	12.5138	0.0830333	0.312764	50.5456	3.579
31	3.125L	3	2018-02-12 10:45:00	03/21/2018 13:26:44.828	-0.000224508	0.112972	-0.0193975	9.76077	14.0854	0.02467	0.02467	0.00616751	0	4.85933	0		-0.1641			-0.548685			0.480808	0.544777	0.569912	0.872854	0.531686	42.73	10	16.38	9.3	35.68	9.8	5.6	6.2	21.6	2575	8740	627	3.131	6283	0.967	1.24	34.08	27.4839	0.0811798	0.265077	51.2282	2.758
31	3.125L	3	2018-02-27 09:50:00	03/21/2018 13:35:44.103	0.000320534	0.116414	0.0276942	10.0581		0	0		0	-2.3388	0		-0.241417			7.59103			0.480808	0.544777	0.569912	0.872854	0.531686	42.73	10	16.38	9.3	35.68	9.8	5.6	6.2	21.6	2575	8740	627	3.131	6283	0.967	1.24	34.08	27.4839	0.0811798	0.265077	51.2282	2.758
31	3.125L	3	2018-03-27 12:00:00	03/23/2018 12:55:44.538	0.000628411	0.236176	0.0542947	20.4056		0	0		0	0	0		-0.0749397			3.40337			0.480808	0.544777	0.569912	0.872854	0.531686	42.73	10	16.38	9.3	35.68	9.8	5.6	6.2	21.6	2575	8740	627	3.131	6283	0.967	1.24	34.08	27.4839	0.0811798	0.265077	51.2282	2.758
31	3.125L	3	2018-04-04 10:45:00	03/23/2018 13:05:44.383	0.000132599	0.18376	0.0114566	15.8768		0	0		0	0	0								0.480808	0.544777	0.569912	0.872854	0.531686	42.73	10	16.38	9.3	35.68	9.8	5.6	6.2	21.6	2575	8740	627	3.131	6283	0.967	1.24	34.08	27.4839	0.0811798	0.265077	51.2282	2.758
31	3.125L	3		03/23/2018 13:16:44.806	-6.79009e-06	0.165807	-0.000586664	14.3257															0.480808	0.544777	0.569912	0.872854	0.531686	42.73	10	16.38	9.3	35.68	9.8	5.6	6.2	21.6	2575	8740	627	3.131	6283	0.967	1.24	34.08	27.4839	0.0811798	0.265077	51.2282	2.758
32	3.125M	3	2018-03-06 09:25:00	03/26/2018 11:55:44.930	4.5778e-05	0.100065	0.00395522	8.64561	9.17853	0.213483	0.213483	0.0711612	0	38.5972	0	1	-1.72933			-3.83146								42.73	10	16.38	9.3	35.68	9.8	5.6	6.2	21.6										0.091559	0.292136	43.5807	0.127
32	3.125M	3	2018-03-27 12:00:00	03/26/2018 12:05:44.760	1.40387e-05	0.128752	0.00121294	11.1242		0	0		0	0	0		-1.10212			17.2042								42.73	10	16.38	9.3	35.68	9.8	5.6	6.2	21.6										0.091559	0.292136	43.5807	0.127
32	3.125M	3	2018-04-04 10:45:00	03/26/2018 12:14:44.014	-4.82454e-06	0.14455	-0.00041684	12.4891		0	0		0	-3.01495	0													42.73	10	16.38	9.3	35.68	9.8	5.6	6.2	21.6										0.091559	0.292136	43.5807	0.127
32	3.125M	3		03/21/2018 14:32:44.347	-0.000453276	0.0515652	-0.039163	4.45524																				42.73	10	16.38	9.3	35.68	9.8	5.6	6.2	21.6										0.091559	0.292136	43.5807	0.127
33	3.125R	3	2018-02-07 10:25:00	03/21/2018 14:43:44.753	8.77148e-05	0.0634481	0.00757856	5.48192	8.80706	0.0157856	0.0157856	0.00326706	0	3.43751	0		0.309959			9.76426			0.540661	0.612304	0.636505	0.99427	0.627662	42.73	10	16.38	9.3	35.68	9.8	5.6	6.2	21.6	2360	10351	548	2.632	4370	0.771	1.45	35.77	24.669	0.081427	0.259987	20.5624	2.776
33	3.125R	3	2018-02-20 09:45:00	03/23/2018 13:27:44.233	-0.000112493	0.124581	-0.00971942	10.7638		0.00843462	0.000338841		0.00809578	1.61103	95.9827		0.664045	0.422425		2.39767	-1.76721		0.540661	0.612304	0.636505	0.99427	0.627662	42.73	10	16.38	9.3	35.68	9.8	5.6	6.2	21.6	2360	10351	548	2.632	4370	0.771	1.45	35.77	24.669	0.081427	0.259987	20.5624	2.776
33	3.125R	3	2018-02-28 09:42:00	03/23/2018 13:35:44.888	-2.23835e-06	0.0600515	-0.000193393	5.18845		0.000210864	0.000210864		0	0.0401687	0		0.286784	0.429847		6.41546	-17.8018		0.540661	0.612304	0.636505	0.99427	0.627662	42.73	10	16.38	9.3	35.68	9.8	5.6	6.2	21.6	2360	10351	548	2.632	4370	0.771	1.45	35.77	24.669	0.081427	0.259987	20.5624	2.776
33	3.125R	3	2018-03-27 12:00:00	03/23/2018 13:43:44.559	-7.24195e-05	0.104972	-0.00625705	9.06958		0	0		0	0	0		0.333117	0.0866314		-2.80371	-2.73217		0.540661	0.612304	0.636505	0.99427	0.627662	42.73	10	16.38	9.3	35.68	9.8	5.6	6.2	21.6	2360	10351	548	2.632	4370	0.771	1.45	35.77	24.669	0.081427	0.259987	20.5624	2.776
33	3.125R	3	2018-04-04 10:45:00	03/23/2018 14:03:44.293	6.02893e-06	0.156616	0.000520899	13.5316		0	0		0	0	0		0.128114	0.481514		9.89853	9.09528		0.540661	0.612304	0.636505	0.99427	0.627662	42.73	10	16.38	9.3	35.68	9.8	5.6	6.2	21.6	2360	10351	548	2.632	4370	0.771	1.45	35.77	24.669	0.081427	0.259987	20.5624	2.776
41	S1	4	2018-02-21 09:50:00	03/26/2018 10:26:44.072	0.000400678	0.22972	0.0346185	19.8478	18.2275	0.00830538	0.00830538	0.0101044	0	1.58357	0		2.44685	1.92436		-22.2855	-23.3885		0	0.328612	0.336135	0.64584	0.391622	51.55	11.75	19.18	16.91	47.84	0.41	0.21	0	0.62	3826	12612	514	3.061	5000	0.975	1.95	29.26	15.0051	0.161248	0.328839	8.339	3.142
41	S1	4	2018-03-28 10:00:00	03/26/2018 10:34:44.769	0.000243857	0.205976	0.0210692	17.7963		0	0		0	0	0		0.798016	0.473256		-7.15168	-6.68062		0	0.328612	0.336135	0.64584	0.391622	51.55	11.75	19.18	16.91	47.84	0.41	0.21	0	0.62	3826	12612	514	3.061	5000	0.975	1.95	29.26	15.0051	0.161248	0.328839	8.339	3.142
41	S1	4	2018-04-04 10:45:00	03/26/2018 10:44:53.385	0.000519614	0.197202	0.0448946	17.0383		0.0220079	0.0220079		0	4.10055	0		-1.7997	0.86566		-57.1065	10.0541		0	0.328612	0.336135	0.64584	0.391622	51.55	11.75	19.18	16.91	47.84	0.41	0.21	0	0.62	3826	12612	514	3.061	5000	0.975	1.95	29.26	15.0051	0.161248	0.328839	8.339	3.142
42	S2	4	2018-02-12 10:45:00	03/26/2018 10:55:44.009	0.000320429	0.24871	0.0276851	21.4885	18.5434	0.00327884	0.00327884	0.00190056	0	0.634027	0	4	0.447256	-0.103007	2.13741	1.96793	4.52127	2.77895						51.55	11.75	19.18	16.91	47.84	0.41	0.21	0	0.62										0.0979842	0.408407	29.6256	0.149
42	S2	4	2018-02-21 09:50:00	03/26/2018 11:06:44.421	-4.01869e-06	0.179128	-0.000347215	15.4767		0.0120521	0.00432339		0.00772872	2.31788	64.1275		1.33949	0.603846	-0.487463	21.9453	-3.12943	5.84903						51.55	11.75	19.18	16.91	47.84	0.41	0.21	0	0.62										0.0979842	0.408407	29.6256	0.149
42	S2	4	2018-03-28 10:00:00	03/26/2018 11:16:44.245	-7.34776e-06	0.221519	-0.000634847	19.1392		1.39152	0		1.39152	261.742	100			0.224718	-1.63423		-4.58101	0.983415						51.55	11.75	19.18	16.91	47.84	0.41	0.21	0	0.62										0.0979842	0.408407	29.6256	0.149
42	S2	4	2018-04-04 10:45:00	03/26/2018 11:25:44.479	5.99901e-06	0.209134	0.000518315	18.0692		4.37526	0		4.37526	822.975	100		0.202408	0.437384	-0.744155	12.7336	-11.5001	8.23155						51.55	11.75	19.18	16.91	47.84	0.41	0.21	0	0.62										0.0979842	0.408407	29.6256	0.149
43	S3	4	2018-02-27 09:50:00	03/26/2018 11:35:04.250	-1.43993e-06	0.17558	-0.00012441	15.1701	16.0631	0	0	0.269212	0	-1.92075	0		0.433472	0.308264	0.562873	-12.0293	-5.81392	-10.7633	0	0.324342	0.324242	0.653324	0.378848	51.55	11.75	19.18	16.91	47.84	0.41	0.21	0	0.62	3972	10371	499	3.048	5199	1.028	2.33	29.52	12.6695	0.0989727	0.382688	8.44012	5.518
43	S3	4	2018-03-05 10:05:00	03/26/2018 11:43:54.713	5.65091e-05	0.196252	0.00488239	16.9562		0.793015	0.793015		0	236.39	0		0.201252	0.4319	0.0860162	-14.5594	10.672	0.382868	0	0.324342	0.324242	0.653324	0.378848	51.55	11.75	19.18	16.91	47.84	0.41	0.21	0	0.62	3972	10371	499	3.048	5199	1.028	2.33	29.52	12.6695	0.0989727	0.382688	8.44012	5.518
43	S3	4	2018-03-28 10:00:00							2.45889	0		2.45889	462.512	100		0.0596006	-0.142782	0.395153	-9.33346	-11.9007	-5.26544	0	0.324342	0.324242	0.653324	0.378848	51.55	11.75	19.18	16.91	47.84	0.41	0.21	0	0.62	3972	10371	499	3.048	5199	1.028	2.33	29.52	12.6695	0.0989727	0.382688	8.44012	5.518
43	S3	4	2018-04-04 10:45:00							0.283832	0.283832		0	62.3524	0		0.320838	0.479894	0.447744	9.47469	11.7648	12.5048	0	0.324342	0.324242	0.653324	0.378848	51.55	11.75	19.18	16.91	47.84	0.41	0.21	0	0.62	3972	10371	499	3.048	5199	1.028	2.33	29.52	12.6695	0.0989727	0.382688	8.44012	5.518
[truncated: 7 more columns]

## Sheet: means mesocosms
site	CO2 flux	CH4 flux (tot)	CH4 flux (diff)	CH4 stock change	CO2 stock change	lignin	phenolics	humic acids	aromatics	fats, waxes, lipids	clay	silt	sand	C	C/N	N	P	S	Mn	Fe	Mg	K
	mmol m-2 d-1	mmol m-2 d-1	mmol m-2 d-1	mmol 0.05 m-3 d-1	mmol 0.05 m-3 d-1									%		%	ppm	ppm	ppm	mass%	ppm	mass%
1.50L	20.2576	0.0126003	0.0126003	0.464359	1.58578	0.447048	0.37934	0.38565	0.62609	0.384647	43	52.67	4.33	30.57	16.6141	1.84	3102	11905	415	2.306	3716	0.849
1.50M	15.6752	0.0318443	0.018116	0.495876	1.85939	0.424686	0.360173	0.365109	0.634319	0.368248	43	52.67	4.33	28.72	14.6531	1.96	3416	12183	424	2.561	4836	0.942
1.50R	13.3718	0.00974204	0.00544812	0.414179	-6.70839						43	52.67	4.33
2.100L	11.0343	0.765359	0.106783	0.527547	-0.00541726	0	0.308379	0.306918	0.579477	0.336124	45.71	53.47	0.82	26.59	12.7837	2.08	3890	8942	444	2.753	5640	1.104
2.100M	15.0652	3.21832	0.192952	0.302324	8.51013						45.71	53.47	0.82
2.100R	18.4549	0.730742	0.0618014	0.454852	2.11263	0	0.28739	0.28667	0.565705	0.30692	45.71	53.47	0.82	27.28	12.5138	2.18	4005	9263	476	2.867	5721	1.131
3.125L	14.0854	0.00616751	0.00616751	-0.160152	3.4819	0.480808	0.544777	0.569912	0.872854	0.531686	42.73	35.68	21.6	34.08	27.4839	1.24	2575	8740	627	3.131	6283	0.967
3.125M	9.17853	0.0711612	0.0711612	-1.41572	6.68638						42.73	35.68	21.6
3.125R	8.80706	0.00488621	0.00326706	0.344404	5.13444	0.540661	0.612304	0.636505	0.99427	0.627662	42.73	35.68	21.6	35.77	24.669	1.45	2360	10351	548	2.632	4370	0.771
S1	18.2275	0.0101044	0.0101044	0.481724	-28.8479	0	0.328612	0.336135	0.64584	0.391622	51.55	47.84	0.62	29.26	15.0051	1.95	3826	12612	514	3.061	5000	0.975
S2	18.5434	1.44553	0.00190056	0.663051	12.2156						51.55	47.84	0.62
S3	16.0631	0.883935	0.269212	0.253791	-6.61187	0	0.324342	0.324242	0.653324	0.378848	51.55	47.84	0.62	29.52	12.6695	2.33	3972	10371	499	3.048	5199	1.028

## Sheet: sediment concentrations
ID	Tiefe	Tiefe_MW	CH4_MW	CH4_SD	CO2_MW	CO2_SD
11	-1	-5.08333	68.6993	5.24157	2620.26	211.036
11	-10	-15.25	70.9158	5.08129	2262.53	317.779
12	-5	-5.08333	77.611	12.5695	951.233	300.144
12	-14	-15.25	69.7883	3.9175	2103.67	150.921
12	-24	-24.3333	77.498	10.3276	1768.26	115.591
13	-2.5	-5.08333	93.3328	4.59522	608.409	15.6926
13	-12	-15.25	70.647	5.34813	1886.96	214.823
13	-21.5	-24.3333	72.5914	4.14688	2081.41	187.845
21	-8	-5.08333	71.3533	6.65899	1972.43	180.877
21	-18	-15.25	73.6814	7.67019	2162.27	268.872
22	-7.5	-5.08333	68.0706	3.71969	2189.07	182.248
22	-16.5	-15.25	67.5155	2.84927	2956.36	221
22	-26.5	-24.3333	71.5882	3.20846	2747.87	171.694
23	-4	-5.08333	73.4948	8.38187	1672.22	154.871
23	-14	-15.25	69.3935	3.32827	2339.9	231.967
23	-24	-24.3333	77.4382	10.7424	2086.1	574.587
31	-2	-5.08333	6.32915	1.82844	448.352	60.0746
32	-2	-5.08333	45.1138	20.2335	470.63	157.351
33	-7.5	-5.08333	71.5459	4.21708	2226.15	135.788
33	-18	-15.25	71.8359	4.26047	2548.51	124.866
41	-10	-5.08333	82.6881	23.1729	1815.27	500.09
41	-20	-15.25	80.4033	13.9506	3255.76	328.079
42	-7	-5.08333	76.0585	10.435	2063.74	228.936
42	-16	-15.25	75.5278	5.46892	2125.08	227.632
42	-26	-24.3333	69.8991	28.3932	758.576	368.322
43	-4.5	-5.08333	71.1784	3.6476	2077.46	164.99
43	-14	-15.25	71.9967	3.75664	3309.39	268.685
43	-24	-24.3333	72.6882	4.16391	3505.01	240.512

## Sheet: water nutrients
Date	Transect	Depth	pH	Leitfähigkeit (µS)	O2 (mg/L)	Chlorophyll µg /L	DOC (mg/L)	TN (mg/L)	CL-mg/L IC	Ca-ICP (mg/L)	Fe-ICP (mg/L)	K-ICP (mg/L)	Mg-ICP (mg/L)	Na-ICP (mg/L)	P-ICP (mg/L)	S-ICP (mg/L)
2017-04-19	1	50	5.97	18.6			12.4	1.121	2.04044	1.172	0.118105	0.793121	0.803461	2.488	0.028171	0.423659
2017-04-19	1	100	6.04	18.6			10.64	0.9493	1.47242	1.106	0.118165	0.898675	0.799045	1.967	0.022369	0.449985
2017-04-19	1	125	6.01	18.6			10.76	0.9193	1.44751	1.263	0.119217	0.676136	0.760046	5.988	0.080577	0.756328
2017-04-19	1	150	6.02	18.6			11.72	0.863	1.46744	1.159	0.123343	0.887637	0.794017	1.787	0.032531	0.395433
2017-04-19	2	50	5.98	18.8			11.08	1.042	1.60695	1.668	0.137641	1.175	0.896439	7.917	0.145929	0.750844
2017-04-19	2	100	6.03	18.5			11.21	0.8682	1.50232	1.16	0.115569	0.906131	0.799092	2.152	0.026913	0.44382
2017-04-19	2	125	6.01	18.9			10.58	0.8833	1.58702	1.092	0.11561	0.699234	0.725696	4.344	0.077661	0.36528
2017-04-19	2	150	6.03	18.8			10.81	0.8516	1.41762	1.182	0.122718	0.933142	0.840724	1.926	0.012972	0.443695
2017-04-19	3	50	6.06	18.6			10.36	0.8155	3.23477	1.16	0.150345	0.707805	0.823826	4.848	0.085909	0.491491
2017-04-19	3	100	6.09	18.3			10.15	0.7989	1.79563	1.245	0.127967	1.818	0.835683	83.573	0.165687	0.584844
2017-04-19	3	125	6.06	18.1			10.47	0.8329	1.37734	1.106	0.111315	0.926911	0.814117	3.346	0.015458	0.406893
2017-04-19	3	150	6.1	18.4			10.26	0.8059	2.16911	1.272	0.132483	0.807021	0.803502	12.106	0.089949	1.256
2017-04-19	S	#N/A	6.08	21.4			10.66	0.9069	5.23496	1.26	0.135929	0.953867	0.827426	3.329	0.012517	0.63074
2017-05-02	1	50	6.8	16.6	10.66		11.36	0.8799	2.46789	0.84569	0.151048	0.5246	0.612303	3.874	0.102752	0.286574
2017-05-02	1	100	6.7	16.1	10.5		10.93	0.8629	1.42216	0.884107	0.12332	0.69443	0.658448	1.249	0.037661	0.238452
2017-05-02	1	125	6.5	16.2	10.66		11.6	0.9202	14.1229	1.508	0.128959	0.643488	0.693759	1.701	0.036748	0.240777
2017-05-02	1	150	6.4	16.2	10.3		11.19	0.868	1.40722	1.215	0.117941	0.704129	0.6761	1.511	0.04425	0.271117
2017-05-02	2	50	6.6	16.3	10.51		12.42	0.9182	2.80153	1.966	0.127786	0.633132	0.64771	2.953	0.076441	0.278174
2017-05-02	2	100	6.6	16.3	10.72		10.95	0.8191	1.39726	0.909607	0.121523	0.703316	0.663576	1.138	0.034607	0.255923
2017-05-02	2	125	6.5	16.2	10.55		11.1	0.8879	20.9089	0.958898	0.131278	0.5815	0.686661	1.809	0.03966	0.254308
2017-05-02	2	150	6.4	16.3	10.45		11.46	0.9124	1.46199	1.502	0.173508	0.920837	0.769033	1.934	0.051664	0.408628
2017-05-02	3	50	6.5	16.3	10.34		11.89	1.038	20.5593	1.38	0.150765	0.683482	0.754668	2.148	0.047172	0.314017
2017-05-02	3	100	6.5	16.5	10.36		11.17	0.9757	1.48689	0.876367	0.122528	0.699726	0.67516	1.157	0.034422	0.246696
2017-05-02	3	125	6.5	16.4	10.52		11.49	0.9041	2.6621	0.88024	0.125975	0.511511	0.610915	4.062	0.126669	0.272338
2017-05-02	3	150	6.4	16.4	10.36		10.78	0.8452	2.54259	0.806324	0.121892	0.553158	0.616882	3.804	0.105136	0.236403
2017-05-02	S	#N/A	6.4	16.3	10.35		11.8	0.8197	1.53669	0.935761	0.130542	0.682303	0.684315	1.296	0.04163	0.225639
2017-05-16	1	50	6.3	17.1	9		12.15	1.156	1.56657	1.236	0.146476	0.629751	0.649769	8.829	0.099662	1.112
2017-05-16	1	100	6.2	17.2	9.4		12.54	0.9198	1.72094	0.881151	0.157409	0.714988	0.681729	1.697	0.049508	0.339249
2017-05-16	1	125	6.3	17.1	9.32		12.14	0.7993	1.59645	1.157	0.157189	0.67065	0.732272	6.645	0.092631	0.451692
2017-05-16	1	150	6.5	17.1	9.3		12	0.8245	2.0247	0.866098	0.131727	0.713813	0.689409	1.504	0.043229	0.314561
2017-05-16	2	50	6.5	17	9.26		12.01	0.7735	4.93588	1.366	0.133802	0.749252	0.858931	3.182	0.042278	0.3075
2017-05-16	2	100	6.5	17.1	9.24		13.37	1.073	1.62632	1.452	0.141389	0.789552	0.871443	3.935	0.041376	0.305306
2017-05-16	2	125	6.5	17.1	9.28		12.95	0.8761	1.55661	0.935034	0.141624	0.74043	0.729647	3.712	0.042668	0.590355
2017-05-16	2	150	6.3	17.2	9.24		12.76	0.8877	1.45203	1.09	0.146784	0.710982	0.751518	2.355	0.056175	0.326034
2017-05-16	3	50	6.4	17	9.14		12.84	0.9096	1.80559	1.077	0.143575	0.725921	0.734955	1.782	0.047776	0.341137
2017-05-16	3	100	6.4	17	8.98		12.81	0.8416	1.60143	0.887531	0.13169	0.711753	0.716235	2.155	0.041068	0.419742
2017-05-16	3	125	6.3	17.2	9		12.38	0.8745	1.84543	1.419	0.151136	0.760342	0.877576	4.096	0.046632	0.355535
2017-05-16	3	150	6.4	17.1	9.22		11.75	0.8973	1.47195	1.645	0.124771	0.859074	0.920512	7.495	0.052406	0.850504
2017-05-16	S	#N/A	6.3	17.2	9.23		11.43	0.7743	2.0496	1.028	0.07231	0.738842	0.759747	1.518	0.026441	0.308471
2017-05-30	1	50	6.6	18.7	8.74		14.22	0.9138	1.40224	1.972	0.140243	0.798073	1.126	6.234	0.060294	0.275737
2017-05-30	1	100	6.6	18.6	8.73		13.48	0.7951	1.61636	1.795	0.183372	0.497415	0.929796	6.113	0.074868	0.491845
2017-05-30	1	125	6.6	18.4	9.11		13.73	0.8774	1.58649	2.062	0.195717	0.313554	0.721899	4.034	0.052332	0.678093
2017-05-30	1	150	6.7	18.6	9.06		13.44	0.8626	1.41718	0.916054	0.180598	0.639235	0.695982	1.285	0.0529	0.293066
2017-05-30	2	50	6.9	18.5	9.47		13.39	0.9696	1.37236	1.102	0.182438	0.759858	0.677663	1.211	0.051615	0.326332
2017-05-30	2	100	6.9	18.6	9.21		13.87	0.8533	1.32754	0.871754	0.170186	0.665803	0.684238	1.052	0.038451	0.265867
2017-05-30	2	125	6.8	18.5	9.66		18.08	1.001	1.36738	0.994639	0.18316	0.227426	0.70769	2.018	0.057267	0.297871
2017-05-30	2	150	6.8	18.5	9.25		15.98	0.9131	1.54665	1.05	0.187369	0.241874	0.668446	2.44	0.049878	0.388075
2017-05-30	3	50	7	18.4	9.55		15.14	0.9441	1.3624	1.104	0.184338	0.637783	0.746592	1.42	0.05063	0.286868
2017-05-30	3	100	6.9	18.4	9.54		14.84	0.9308	1.4122	1.026	0.181924	0.145028	0.659844	2.854	0.051265	0.3715
2017-05-30	3	125	6.9	18.4	9.54		15.7	0.9736	1.42216	1.025	0.179766	0.709443	0.754571	1.24	0.052021	0.292667
2017-05-30	3	150	6.9	18.3	9.33		15.32	0.9109	1.40224	1.04	0.189746	0.425599	0.700014	2.348	0.07127	0.36406
2017-05-30	S	#N/A	6.8	18.3	9.27		15.37	0.9551	1.40722	1.267	0.1942	0.13264	0.701971	3.031	0.060801	0.335011
2017-06-13	1	50	7	19.1	8.27		15.07	1.086	2.00976	1.311	0.215551	0.27173	0.765866	2.61	0.046413	0.406506
2017-06-13	1	100	7.1	19.2	8.62		14.24	0.9633	1.7807	1.264	0.204926	0.57062	0.746691	2.584	0.05867	0.397135
2017-06-13	1	125	6.7	19	8.59		17.85	1.508	1.48191	1.167	0.211228	0.312588	0.728977	2.396	0.053115	0.489101
2017-06-13	1	150	6.7	19.1	8.54		14.84	0.943	1.81555	1.463	0.222288	0.239584	0.755165	2.918	0.057473	0.465341
2017-06-13	2	50	6.8	19.2	8.55		14.97	0.8687	1.82551	1.07	0.195684	0.284759	0.743942	2.863	0.040803	0.451797
2017-06-13	2	100	6.8	19.1	8.57		15.84	0.9551	2.45793	1.042	0.208037	0.58197	0.719843	3.291	0.072275	0.35087
2017-06-13	2	125	6.7	19.2	8.62		21.57	1.171	1.45701	1.128	0.210075	0.199394	0.719302	2.73	0.056338	0.423792
2017-06-13	2	150	6.8	19.2	8.53		18.98	1.086	1.46199	1.3	0.213396	0.286673	0.74803	2.432	0.053468	0.464741
2017-06-13	3	50	6.7	19.2	8		17.3	1.027	1.46697	1.396	0.214118	0.249248	0.743854	2.61	0.048885	0.464782
2017-06-13	3	100	6.7	19.2	8.35		17.29	0.9836	1.44208	1.141	0.218917	0.234879	0.745583	2.454	0.052187	0.437586
2017-06-13	3	125	6.8	19.2	8.5		16.91	0.9288	1.80559	1.441	0.230637	0.258355	0.763235	3.212	0.057282	0.561759
2017-06-13	3	150	6.6	19.2	8.54				1.47693	1.096	0.21204	0.16707	0.721474	1.993	0.044269	0.384987
2017-06-13	S	#N/A	6.8	19.2	8.51		16.19	0.9182	3.35926	1.15	0.208677	0.333375	0.750581	3.041	0.059541	0.473207
2017-06-27	1	50	5.8	19	8.84		13	0.7813	2.149	1.27	0.215634	0.169793	0.703889	3.19	0.050137	0.536415
2017-06-27	1	100	6.3	19	8.9		13.58	0.8465	2.424	1.26	0.219551	0.237743	0.788919	2.561	0.046581	0.385674
2017-06-27	1	125	6.5	19	8.82		14.3	0.98	1.598	1.232	0.214646	0.700777	0.751007	1.173	0.038221	0.334523
2017-06-27	1	150	6.6	19	8.53		14.05	0.8742	2.062	1.235	0.208899	0.760231	0.755166	1.343	0.04413	0.388342
2017-06-27	2	50	6.4	19	8.03		15.21	0.9217	1.951	1.235	0.220245	0.182833	0.65917	3.54	0.058699	0.585894
2017-06-27	2	100	6.4	19	8		14.85	0.9419	2.071	1.199	0.215929	0.585984	0.759495	1.575	0.037055	0.355288
2017-06-27	2	125	6.3	19	8.32		14.68	0.924	1.658	1.34	0.226367	0.369332	0.780548	2.221	0.046957	0.418898
2017-06-27	2	150	6.4	19	8.51		14.78	0.8307	1.712	1.313	0.223716	0.301444	0.736176	2.34	0.045961	0.407879
2017-06-27	3	50	6.5	19	8.36		13.12	0.7782	1.707	1.315	0.220462	0.245556	0.74683	2.381	0.039536	0.365822
2017-06-27	3	100	6.6	19	8.42		14.77	0.8131	1.691	1.154	0.210682	0.455579	0.686915	2.771	0.04395	0.491354
2017-06-27	3	125	6.5	19	8.7		14.84	0.8346	0	1.168	0.22178	0.102572	0.653377	2.326	0.046538	0.516292
2017-06-27	3	150	6.5	19	8.45		14.2	0.8979	3.996	1.784	0.216666	0.475537	0.756685	2.189	0.03893	0.436872
2017-06-27	S	#N/A							0
2017-07-11	1	50	8.1	16.9	8.57		19.17	0.9718	1.859	0.849052	0.146993	0.567699	0.638558	2.048	LOQ	0.370163
2017-07-11	1	100	7.1	16.9	9.14		13.71	0.7773	1.9	0.973805	0.149584	0.300846	0.621871	2.353	LOQ	0.335715
2017-07-11	1	125	7.1	16.9	8.98		14.68	0.7353	1.714	1.023	0.143759	0.159427	0.545493	4.402	LOQ	0.650544
2017-07-11	1	150	7.1	16.9	8.97		21.82	0.9991	1.56	0.997474	0.14319	0.172709	0.579379	3.441	LOQ	0.483072
2017-07-11	2	50	7.1	16.9	8.98		14.63	0.7534	1.607	0.982232	0.153308	0.153277	0.573536	3.47	LOQ	0.485469
2017-07-11	2	100	7.1	16.9	9.07		14.23	0.7347	1.623	1.815	0.145978	0.469732	0.549086	4.052	LOQ	0.446213
2017-07-11	2	125	7.1	16.9	9.08		14.35	0.7669	1.585
2017-07-11	2	150	7.2	16.9	9.05		14.95	0.7589	1.564	1.138	0.16789	0.291382	0.637739	3.577	LOQ	0.563828
2017-07-11	3	50	7.2	16.9	9		14.57	0.7489	1.6	0.922541	0.14463	0.317706	0.621313	1.967	LOQ	0.321243
2017-07-11	3	100	7.2	16.9	9.05		14.07	0.7218	1.645	1.018	0.147553	0.272448	0.591482	3.35	LOQ	0.492504
2017-07-11	3	125	7.2	16.9	9.07		14.95	0.7445	2	1.065	0.153328	0.150604	0.581731	3.191	LOQ	0.496056
2017-07-11	3	150	7.2	16.9	9.16		14.08	0.6882	1.548	1.459	0.149206	0.18485	0.602297	3.377	LOQ	0.40114
2017-07-11	S	#N/A	7.3	16.9	9.15		14.3	0.7548	1.611	0.85206	0.148274	0.762114	0.563442	2.178	LOQ	0.3285
2017-07-25	1	50	8.1	16.3	9.96		12.91	0.7924	1.285	0.98857	0.139768	0.707574	0.532234	1.649	LOQ	0.410931
2017-07-25	1	100	8.3	16.5	10.07		14.23	0.8593	1.504	0.872511	0.126885	0.636581	0.569129	1.252	LOQ	0.361464
2017-07-25	1	125	8.4	16.6	10.09		13.44	0.7753	1.461	0.983811	> 0.297205	0.7617	0.605731	1.202	LOQ	0.346724
2017-07-25	1	150	8.6	16.6	10.17		13.93	0.8733	1.296	0.952339	0.114311	0.791648	0.572078	2.089	LOQ	0.361946
2017-07-25	2	50	8.6	16.2	9.86		13.81	0.8372	0.233	1.696	0.091806	0.892902	0.94137	6.983	LOQ	0.469576
2017-07-25	2	100	8.2	16.4	9.94		13.07	0.7537	0.45	0.871633	0.11361	0.634484	0.560789	1.286	LOQ	0.325141
2017-07-25	2	125	8.6	16.5	10.06		14.39	0.7735	0.225	0.889395	0.106553	0.709173	0.499678	1.478	LOQ	0.352508
2017-07-25	2	150	8.5	16.6	10.1		13.62	0.7293	1.593	0.990454	0.118069	0.694715	0.539972	1.485	LOQ	0.344797
2017-07-25	3	50	8.3	16.5	9.83		12.78	0.7423	1.586	1.319	0.116889	0.748616	0.890955	6.471	LOQ	0.571132
2017-07-25	3	100	8.4	16.5	9.91		13.26	0.7891	1.555	0.992997	0.106592	0.681951	0.634602	3.237	LOQ	0.555116
2017-07-25	3	125	8.5	16.5	9.97		13.15	0.7882	1.515	0.949168	0.134115	0.66003	0.534242	1.454	LOQ	0.360449
2017-07-25	3	150	8.5	16.6	10.08		13.12	0.8199	1.621	0.882336	0.116228	0.722622	0.516683	1.426	LOQ	0.353471
2017-07-25	S	#N/A	8.6	16.6	10.09		13.4	0.7356	2.559	0.800707	0.124928	0.391354	0.650825	1.857	LOQ	0.365623
2017-08-08	1	50		16.1	10		14.57	0.9051	0.258	0.834263	0.089559	0.610442	0.493599	7.057	0.157525	0.369995
2017-08-08	1	100		16.2	10.12		14.56	0.7582	2.678	1.079	0.074627	0.546556	0.616636	2.573	LOQ	0.363151
2017-08-08	1	125		16.5	10.24		14.66	0.7802	0.497	0.778369	0.089472	0.359244	0.472431	6.926	0.13816	0.388539
2017-08-08	1	150		16.4	10.22		14.23	0.7014	1.363	0.792921	0.103164	0.381073	0.479748	6.702	0.133821	0.369888
2017-08-08	2	50		16.3	10.22		16.16	1.023	0.531	0.752322	0.093476	0.344259	0.468732	6.847	0.149052	0.39019
2017-08-08	2	100		16.2	10.18		14.67	0.7789	17.676	0.733392	0.100047	0.333214	0.460952	6.745	0.147296	0.382011
2017-08-08	2	125		16.5	10.24		14.27	0.7311	2.374	0.742906	0.094247	0.346314	0.455146	7.43	0.151426	0.39446
2017-08-08	2	150		16.4	10.22		16.76	1.025	2.393	0.79096	0.102092	0.397014	0.475586	6.221	0.134269	0.382509
2017-08-08	3	50		16.5	10.15		14	0.7668	1.592	0.720968	0.111977	0.35099	0.449881	7.09	0.151632	0.398211
2017-08-08	3	100		16.5	9.94		14.63	0.7117	0.293	1.04	0.13898	0.730227	0.592467	2.051	LOQ	0.394794
2017-08-08	3	125		16.5	10.05		13.95	0.7194	3.764	0.828459	0.181179	0.34301	0.479266	7.242	0.154433	0.41357
2017-08-08	3	150		16.5	10.27		15.51	0.9666	3.5	0.83154	0.191481	0.353687	0.534856	6.553	0.15118	0.445802
2017-08-08	S	#N/A		16.6	10.17		13.95	0.7435	3.844	0.727157	0.095284	0.319427	0.444699	7.225	0.148955	0.377543
2017-08-29	1	50	6.3	17.8	8.44		18.4	0.9186	4.179	0.770673	0.083385	0.417271	0.486867	8.46	0.211061	0.516721
2017-08-29	1	100	6.8	17.2	9.61		16.22	0.6758	3.083	0.720266	0.077235	0.372634	0.473861	7.69	0.157197	0.398
2017-08-29	1	125	7.6	16.8	10.04		16.08	0.6684	2.447	0.664987	0.076615	0.294027	0.472429	7.798	0.168026	0.381126
2017-08-29	1	150	7.5	16.8	10.08		18.07	1.025	2.279	0.716155	0.083934	0.314149	0.460319	8.04	0.167381	0.398259
2017-08-29	2	50	6.6	17.5	9.3		15.67	0.6845	2.964	0.681562	0.078422	0.415386	0.481644	8.062	0.171866	0.408198
2017-08-29	2	100	6.7	17.1	9.59		15.9	0.6552	0.373	0.755446	0.080279	0.543118	0.470646	8.336	0.171594	0.469648
2017-08-29	2	125	7	16.9	9.89		18.57	1.029	2.118	0.736606	0.076645	0.439927	0.468698	7.721	0.161478	0.398457
2017-08-29	2	150	7.3	16.9	9.99		16.17	0.6907	1.922	0.852903	0.08523	0.468057	0.486947	7.979	0.165796	0.43013
2017-08-29	3	50	7.8	16.7	10		17.31	0.9046	3.661	0.659979	0.086996	1.339	0.443302	7.587	0.155464	0.399114
2017-08-29	3	100	8.1	16.8	10.11		15.61	0.6749	2.562	0.701678	0.076597	0.377881	0.455094	7.706	0.156489	0.402272
2017-08-29	3	125	8	16.7	10.1		16.51	0.6726	2.378	0.728591	0.085788	0.305058	0.446332	8.022	0.154186	0.401626
2017-08-29	3	150	7.8	16.7	10.14		18.72	1.039	2.838	0.488946	0.083329	0.296216	0.433228	7.802	0.165641	0.389861
2017-08-29	S	#N/A	7.3	16.9	9.88		16.13	0.7143	2.659	0.666456	0.076296	0.300475	0.424463	7.936	0.166536	0.401247
2017-09-12	1	50	6.4	17.1	9.78		17.83	1.034	2.039	0.974398	0.066239	0.298095	0.509205	7.306	0.160606	0.420605
2017-09-12	1	100	6.7	17.1	10.27		15.95	0.6681	1.946	0.862182	0.064232	0.213405	0.473159	8.028	0.17637	0.407222
2017-09-12	1	125	6.7	16.9	10.53		14.87	0.7005	1.628	0.770346	0.090512	0.258144	0.475695	7.748	0.165621	0.384725
2017-09-12	1	150	6.9	16.8	10.31		15.34	0.6281	1.784	0.783602	0.056682	0.204102	0.46501	8.097	0.175827	0.395452
2017-09-12	2	50					18.29	1.01	3.072	0.783663	0.06446	0.198036	0.465439	7.857	0.180448	0.390989
2017-09-12	2	100					15.38	0.651	0	0.80297	0.059145	0.243878	0.477903	7.48	0.164031	0.401952
2017-09-12	2	125					15.89	0.638	2.389	0.785071	0.059168	0.259685	0.46716	7.797	0.158425	0.400418
2017-09-12	2	150					15.07	0.6525	2.591	0.881116	0.056722	0.250832	0.473746	8.075	0.167118	0.414505
2017-09-12	3	50					15.55	0.6821	2.78	0.850155	0.05931	0.253806	0.476539	7.863	0.172181	0.398041
2017-09-12	3	100					15.55	0.6197	2.887	0.804182	0.057327	0.217803	0.468798	7.468	0.166771	0.380576
2017-09-12	3	125					15.64	0.6108	2.542	0.767535	0.058805	0.215778	0.464332	7.626	0.163798	0.380545
2017-09-12	3	150					15.5	0.648	2.348	0.818727	0.066204	0.213465	0.453316	8.171	0.181608	0.398311
2017-09-12	S	#N/A					17.85	1.022	2.548	0.701028	0.061066	0.244117	0.477411	7.891	0.173156	0.398335
2017-09-27	1	50	6.8	17.8	10.36		16.36	0.6937	13.067	1.104	0.035318	0.504828	0.630089	3.435	LOQ	0.427953
2017-09-27	1	100	6.9	17.8	10.42		16.44	0.6301	1.585	1.034	0.029993	0.705469	0.692453	1.551	LOQ	0.36516
2017-09-27	1	125	6.9	17.7	10.58		16.18	0.6544	12.763	0.964741	0.034724	0.363974	0.635931	2.714	LOQ	0.367395
2017-09-27	1	150	7	17.7	10.51		15.96	0.6342	1.992	1.061	0.040184	0.694038	0.686748	1.678	LOQ	0.356738
2017-09-27	2	50	7.3	17.5	10.93		16.27	0.6768	13.4	0.924032	0.030466	0.322099	0.628307	3.036	LOQ	0.368808
2017-09-27	2	100	7.3	17.5	10.96		18.77	0.9974	1.983	1.082	0.035104	0.680452	0.683975	1.64	LOQ	0.367489
2017-09-27	2	125	7.1	17.8	10.87		16.49	0.6252	15.289	0.979846	0.030197	0.352114	0.623342	3.166	LOQ	0.368332
2017-09-27	2	150	7	17.8	10.77		16.7	0.6059	1.578	1.096	0.056986	0.728324	0.705253	1.465	LOQ	0.366306
2017-09-27	3	50	6.9	17.7	10.57		14.52	0.5877	2.476	0.776487	0.035263	0.290635	0.534738	7.857	0.189693	0.419595
2017-09-27	3	100	6.7	17.7	10.63		16.78	0.6358	10.917	1.099	0.030627	0.70719	0.679402	1.866	LOQ	0.374677
2017-09-27	3	125	6.8	17.8	10.55		15.91	0.6514	1.981	1.029	0.030098	0.414087	0.652345	2.938	LOQ	0.37354
2017-09-27	3	150	6.9	17.7	10.75		16.71	0.6882	2.184	1.075	0.034528	0.684357	0.691721	1.745	LOQ	0.36104
2017-09-27	S	#N/A	6.8	17.8	10.59		17.56	0.8999	13.581	0.930747	0.025807	0.347008	0.637464	2.648	LOQ	0.366012
2017-10-11	1	50	6.1	18.9	9.15	6	16.43	0.6315	22.565	1.216	0.060713	5.221	0.720787	3.014	LOQ	0.394767
2017-10-11	1	100	6.1	18.8	9.33		16.01	0.6926	6.049	1.091	0.035534	1.17	0.742618	1.827	LOQ	0.372287
2017-10-11	1	125	6.1	18.8	9.5	5	15.59	0.7313	2.056	1.044	0.020625	0.782593	0.745546	1.639	LOQ	0.366577
2017-10-11	1	150	6.1	18.8	9.47		15.38	0.664	15.567	0.952501	0.02047	0.349696	0.674265	3.432	LOQ	0.378004
2017-10-11	2	50	6	18.8	9.3	6.4	16.4	0.6984	1.771	1.127	0.025877	0.723748	0.719524	2	LOQ	0.377265
2017-10-11	2	100	6	18.7	9.32		15.54	0.677	1.594	1.084	0.02056	0.744965	0.754721	1.533	LOQ	0.371926
2017-10-11	2	125	6	18.8	9.38	6	15.52	0.6376	1.562	1.046	0.020591	0.705213	0.753687	1.412	LOQ	0.360518
2017-10-11	2	150	6.1	18.7	9.47		15.56	0.683	1.613	1.055	0.020438	0.738528	0.712492	1.669	LOQ	0.368382
2017-10-11	3	50	6.2	18.7	9.52	6	15.53	0.7034	1.862	1.134	0.020584	0.671824	0.742389	1.446	LOQ	0.369147
2017-10-11	3	100	6.1	18.8	9.48		16.76	0.6866	1.454	0.741117	0.02069	0.28185	0.5761	8.11	0.176266	0.400819
2017-10-11	3	125	6.1	18.7	9.43	5.3	15.97	0.6875	1.504	1.07	0.020672	0.71296	0.747382	1.47	LOQ	0.371362
2017-10-11	3	150	6.1	18.7	9.39		16.9	0.6886	1.937	1.21	0.020467	0.702325	0.762497	1.55	LOQ	0.370069
2017-10-11	S	#N/A	6.1	18.7	9.49	6.1	16.26	0.6673	2.297	0.649624	0.020692	0.185058	0.559626	8.561	0.2051	0.405541
2017-10-24	1	50	6.3	19.8	9.26		16.26	0.8877	1.915	1.497	0.062611	0.676708	0.851108	3.733	0.016432	0.39515
2017-10-24	1	100	6.4	19.5	9.71		16.13	0.9147	2.203	1.208	0.056749	0.418179	0.604722	17.246	0.375967	0.514887
2017-10-24	1	125	6.3	19.7	9.6		17.14	1.153	3.183	1.423	0.056471	0.819291	0.770097	7.927	0.159128	0.479259
2017-10-24	1	150	6.3	19.8	9.53		16.36	0.8516	3.736	1.19	0.060925	0.686265	0.724958	9.216	0.171251	0.421434
2017-10-24	2	50	6.3	19.8	9.47		15.89	0.8973	2.117	1.926	0.062567	1.112	0.930622	2.835	0.035617	0.627253
2017-10-24	2	100	6.2	19.7	9.43		15.63	0.8535	1.665	1.52	0.045856	1.034	0.890339	2.661	0.016406	0.406423
2017-10-24	2	125	6.2	19.8	9.53		15.19	0.8727	1.78	1.428	0.057008	0.916632	0.855434	3.463	0.02671	0.442574
2017-10-24	2	150	6.2	19.8	9.54		15.95	0.9789	3.273	1.468	0.033924	1.036	0.863683	3.128	0.033562	0.396622
2017-10-24	3	50	6.3	19.9	9.61		15.12	0.8763	3.178	0.934146	0.060661	0.528394	0.664491	11.001	0.192222	0.441902
2017-10-24	3	100	6.2	19.8	9.55		15.81	0.8511	2.55	1.51	0.058695	1.049	0.815597	3.15	0.029921	0.381667
2017-10-24	3	125	6.3	19.7	9.53		15.55	0.7751	3.357	1.101	0.057762	0.479328	0.705071	10.162	0.192336	0.440798
2017-10-24	3	150	6.2	19.8	9.56		16.94	0.8141	2.979	1.056	0.055393	0.448643	0.706829	9.28	0.174906	0.430204
2017-10-24	S	#N/A	6.3	19.8	9.61		16	0.8973	2.661	1.74	0.062519	1.13	0.831098	3.549	0.061989	0.404223
2017-11-07	1	50	6.2	20.5	8.32		15.68	0.8661	4.028	0.833405	0.094108	0.38428	0.756427	9.192	0.181864	0.431908
2017-11-07	1	100	6.3	20.5	8.57		14.2	0.8336	2.939	1.573	0.088266	1.027	0.919343	2.703	0.06117	0.438635
2017-11-07	1	125	6.3	20.5	5.59		14.67	1.011	3.19	1.434	0.086943	1.003	0.909641	1.94	0.054448	0.412461
2017-11-07	1	150	6.2	20.5	8.5		15.33	0.9213	1.703	1.384	0.084782	0.950133	0.911594	1.705	0.017067	0.402545
2017-11-07	2	50	6.1	20.5	8.46		15.44	0.8503	1.632	1.377	0.081491	0.94693	0.898771	2.232	0.028841	0.422063
2017-11-07	2	100	6.2	20.5	8.46		15.77	0.7869	1.65	0.91591	0.091751	0.367648	0.799416	9.238	0.20851	0.461703
2017-11-07	2	125	6.1	20.5	8.42		15.65	0.7671	1.509	1.44	0.085927	1.005	0.931817	2.504	0.033857	0.408132
2017-11-07	2	150	6.1	20.5	8.52		14.66	0.8569	1.701	1.362	0.083307	0.945799	0.89943	1.877	0.021651	0.394014
2017-11-07	3	50	6.2	20.5	8.46		13.96	0.8664	1.59	1.437	0.081676	1.036	0.906353	1.746	0.023792	0.413935
2017-11-07	3	100	6.1	20.5	8.47		16.03	0.9546	1.523	1.429	0.084592	1.048	0.919028	1.902	0.019718	0.435941
2017-11-07	3	125	6.1	20.5	8.38		16.38	0.9449	1.571	1.523	0.088475	1.042	0.918553	2.25	0.029063	0.449941
2017-11-07	3	150	6.1	20.5	8.48		15.23	0.8519	1.563	1.231	0.086654	0.713617	0.910206	4.845	0.063453	0.446872
2017-11-07	S	#N/A	6.1	20.5	8.51		16.57	1.177	3.278	1.357	0.081791	0.988625	0.895997	1.748	0.020914	0.400471
2017-11-21	1	50	6.1	21.5	9.72		15.94	1.091	1.861	0.929507	0.077072	0.424893	0.731354	9.202	0.341576	0.435045
2017-11-21	1	100	6.1	21.5	9.79		14.23	0.9477	1.587	1.224	0.067381	0.781801	0.791807	7	0.146441	0.47301
2017-11-21	1	125	6.2	21.5	10.01		15.11	0.9827	1.532	1.205	0.068174	0.739202	0.76375	7.742	0.138866	0.440722
2017-11-21	1	150	6.2	21.5	10.02		14.23	0.8448	1.552	1.206	0.069095	0.900361	0.789001	7.425	0.140356	0.477245
2017-11-21	2	50	6.1	21.5	9.9		14.3	1.026	3.269	1.448	0.068594	0.907259	0.876878	2.108	0.024479	0.379945
2017-11-21	2	100	6.1	21.5	9.91		14.67	0.9874	1.809	1.37	0.06943	0.966814	0.881015	1.81	0.01781	0.391438
2017-11-21	2	125	6.1	21.5	9.97		13.85	0.854	0	1.455	0.066386	0.935404	0.869265	2.261	0.014604	0.384964
2017-11-21	2	150	6.1	21.5	10.02		13.9	0.8369	1.71	1.485	0.069144	0.977358	0.892686	2.064	0.022765	0.389775
2017-11-21	3	50	6.2	21.6	10.16		13.96	0.7827	2.099	1.337	0.061771	0.981599	0.872655	1.9	0.015528	0.37184
2017-11-21	3	100	6.2	21.5	10.04		13.56	0.9546	2.104	1.316	0.062129	0.937022	0.867025	1.77	0.009304	0.362748
2017-11-21	3	125	6.2	21.5	9.95		14.68	0.8834	2.566	1.46	0.062848	0.962276	0.872733	2.865	0.03467	0.38292
2017-11-21	3	150	6.1	21.5	9.97		16.81	1.03	13.968	1.341	0.24764	0.993629	0.856147	1.828	-0.001504	2.216
2017-11-21	S	#N/A	6.1	21.5	9.99		15.32	0.9316	1.668	1.289	0.066708	0.960099	0.853607	1.574	0.014686	0.374358
2018-01-16	1	50
2018-01-16	1	100
2018-01-16	1	125
2018-01-16	1	150
2018-01-16	2	50
2018-01-16	2	100
2018-01-16	2	125
2018-01-16	2	150
2018-01-16	3	50
2018-01-16	3	100
2018-01-16	3	125
2018-01-16	3	150
2018-01-16	S	#N/A	6.5	21.5	10.85		11.48	2.134		1.144	0.07165	1.147	0.823264	1.311	0.008882	0.430312
2018-03-16	1	50	6.5	19.7	11.2		9.363	0.7	2.38	0.932093	0.047112	0.361537	0.710891	9.587	0.172016	0.490378
2018-03-16	1	100
2018-03-16	1	125
2018-03-16	1	150
2018-03-16	2	50	6.4	19.7	11.34		8.92	0.6749	17.993	1.429	0.044895	0.97582	0.835078	2.548	0.024211	0.441612
2018-03-16	2	100
2018-03-16	2	125
2018-03-16	2	150
2018-03-16	3	50	6.3	19.7	11.02		9.328	0.6943	1.747	1.308	0.046238	0.95394	0.834245	1.772	0.017326	0.428652
2018-03-16	3	100
2018-03-16	3	125
2018-03-16	3	150
2018-03-16	S	#N/A	6.4	19.8	11.1		8.823	0.6763	1.829	1.242	0.045572	0.936018	0.828373	1.597	0.006019	0.430411
2018-03-27	1	50	6.4	19.2	11.98		11.13	1.173	2.588	0.957854	0.063662	0.589503	0.697674	10.139	0.209469	0.542731
2018-03-27	1	100	6.4		12.07		9.545	0.642	2.258	1.393	0.051372	1.117	0.823934	2.539	0.0243	0.505832
2018-03-27	1	125	6.4	19.2	11.91		9.455	0.6327	1.716	1.271	0.052111	1.027	0.827709	1.801	0.030481	0.454897
2018-03-27	1	150	6.4		11.98		9.63	0.6472	1.718	1.333	0.051355	1.124	0.828631	1.688	0.031524	0.476523
2018-03-27	2	50	6.3		11.76		8.987	0.6076	1.958	0.83849	0.051017	0.362991	0.648677	10.959	0.198622	0.555575
2018-03-27	2	100	6.5		11.78		9.313	0.6935	2.16	1.37	0.04925	1.039	0.802602	1.923	0.051444	0.450458
2018-03-27	2	125	6.3		11.92		8.838	0.5774	1.762	1.237	0.049444	0.977324	0.79398	1.652	0.032012	0.444367
2018-03-27	2	150	6.4		11.96		8.953	0.599	1.665	1.213	0.046263	1.045	0.789549	1.61	0.039144	0.445325
2018-03-27	3	50	6.3		11.97		8.934	0.563	2.112	0.864282	0.062215	0.324074	0.641348	10.114	0.210208	0.500093
2018-03-27	3	100	6.3		11.89		9.122	0.6059	1.769	1.328	0.047848	1.058	0.802581	1.936	0.035202	0.457642
2018-03-27	3	125	6.2		12.1		9.371	0.6109	1.7	1.246	0.045195	0.97456	0.793631	1.68	0.023518	0.450103
2018-03-27	3	150	6.3		11.97		9.101	0.586	1.659	1.186	0.048114	0.931924	0.790385	1.551	0.022117	0.448113
2018-03-27	S	#N/A	6.2		12.05		9.293	0.6687	1.762	1.197	0.050341	1.059	0.787396	3.388	0.026058	0.639137
2018-04-10	1	50	6.3		8.87		10.76	0.6827	1.894	1.207	0.063742	0.903322	0.740341	2.475	0.037749	0.45111
2018-04-10	1	100	6.2		9.09		10.4	0.6996	1.595	1.174	0.05791	0.934524	0.765248	1.435	0.03073	0.447229
2018-04-10	1	125	6.1		9.16		10.72	0.7123	1.586	1.131	0.058698	0.906923	0.754177	1.406	0.034003	0.430497
2018-04-10	1	150	6.2		9.14		10.77	0.7493	1.568	1.136	0.06706	0.893553	0.749224	1.382	0.03235	0.433287
2018-04-10	2	50	6.1		9		11.42	0.7899	2.3	1.286	0.066701	1.013	0.767376	2.144	0.029237	0.448581
2018-04-10	2	100	6.1		9.04		10.54	0.8682	2.442	0.8438	0.062704	0.445437	0.622486	9.204	0.167149	0.46932
2018-04-10	2	125	6.1		9.18		10.94	0.754	1.627	1.114	0.055442	0.964331	0.743703	1.487	0.035677	0.43049
2018-04-10	2	150	6.1		9.15		10.79	0.7878	2.098	1.151	0.050067	1.1	0.754654	1.606	0.021999	0.44066
2018-04-10	3	50	6.4		9.15		11.42	0.6859	2.548	1.114	0.059061	0.985772	0.727827	1.5	0.040266	0.440223
2018-04-10	3	100	6.4		9.18		10.61	0.7737	1.662	1.166	0.049846	0.932227	0.747783	1.587	0.027527	0.442703
2018-04-10	3	125	6.3		9.15		11.06	0.7573	1.766	1.18	0.060129	0.926545	0.75215	1.656	0.03082	0.440985
2018-04-10	3	150	6.3		9.15		10.39	0.6567	2.034	1.252	0.055115	0.924953	0.759851	1.894	0.023391	0.448466
2018-04-10	S	#N/A	6.3	18.9	9.15		11.05	0.7736	2.272	0.886172	0.058341	0.311331	0.625117	9.384	0.194053	0.483653
2018-04-24	1	50	6.1	20.3	8.3	9.2	9.466	0.5066	2.315	1.17	0.090264	0.735318	0.763303	4.685	0.096918	0.425805
2018-04-24	1	100	6.1	20.4	8.4	8.8	9.126	0.6845	1.686	1.493	0.087927	1.255	0.853493	1.934	0.039344	0.414945
2018-04-24	1	125	6.1	20.3	8.6	5.4	8.956	0.6025	1.608	1.357	0.088165	1.108	0.844215	1.697	0.034976	0.403761
2018-04-24	1	150	6.1	20.4	8.54	9.8	9.138	0.5357	1.558	1.288	0.077502	1.035	0.832884	1.589	0.039283	0.4004
2018-04-24	2	50	6	20.1	7.58	10.5	8.711	0.4839	1.521	1.232	0.096536	0.557544	0.714013	5.334	0.039676	0.456403
2018-04-24	2	100	6	20.3	7.92	8.2	8.517	0.4316	1.185	1.509	0.086903	1.15	0.845371	2.152	0.04013	0.427689
2018-04-24	2	125	6.1	20.3	8.07	8.7	8.939	0.4282	1.818	1.395	0.093427	1.096	0.837152	1.921	0.034626	0.411039
2018-04-24	2	150	6	20.3	8.01	8.3	8.686	0.436	1.378	1.368	0.094578	1.087	0.840527	1.948	0.036714	0.418488
2018-04-24	3	50	6.1	20.4	8.12	9.1	9.641	0.5527	2.918	0.91183	0.096223	0.709711	0.684107	10.112	0.19476	0.476081
2018-04-24	3	100	6.1	20.4	8.05	8.8	9.13	0.4942	2.09	1.527	0.094623	1.146	0.851799	2.105	0.046345	0.439487
2018-04-24	3	125	6	20.4	8.06	7.9	9.217	0.4972	1.788	1.362	0.098096	1.09	0.850744	1.678	0.044878	0.410869
2018-04-24	3	150	6.1	20.4	8.47	11.2	9.045	0.471	1.428	1.342	0.090879	1.054	0.843376	1.713	0.037086	0.420268
2018-04-24	S	#N/A	6.1	20.4	8.42	11.58	9.003	0.4592	1.466	1.294	0.090257	1.059	0.836932	1.747	0.045658	0.42757
2018-05-08	1	50	6.5	20.3	8.68	24	11.1	0.8205	15.42	1.27	0.143487	0.697728	0.76128	3.449	0.065031	0.38614
2018-05-08	1	100	6.6	20.3	9.32	26	12.39	1.207	3.164	1.401	0.139717	1.464	0.815835	2.672	0.068736	0.41048
2018-05-08	1	125	6.6	20.1	9.4	26	11.14	0.8469	2.497	1.309	0.133092	1.295	0.837391	1.764	0.069253	0.418381
2018-05-08	1	150	6.7	20	9.55	14	11.24	0.7545	1.886	1.309	0.131669	1.004	0.80108	1.467	0.044595	0.401136
2018-05-08	2	50	6.8	19.9	9.69	20	11.14	0.6939	12.206	1.186	0.126582	1.035	0.766658	2.024	0.061927	0.397213
2018-05-08	2	100	7	20	9.68	13.4	11.34	0.6635	2.186	1.281	0.139744	0.617948	0.79258	2.846	0.043601	0.373965
2018-05-08	2	125	6.8	20.1	9.61	14	11.36	0.7602	2.306	1.302	0.142709	1.071	0.799813	1.884	0.058058	0.402829
2018-05-08	2	150	6.8	20.3	9.54	22	11.18	0.7278	1.992	1.244	0.137684	1.034	0.784036	1.85	0.044751	0.389368
2018-05-08	3	50	6.7	20.1	9.31	23.3	11.94	0.9257	2.808	0.989225	0.151866	0.592714	0.677308	9.078	0.192395	0.47807
2018-05-08	3	100	6.7	20.1	9.43	27.8	11.79	0.8262	1.78	1.389	0.169477	1.067	0.817261	1.892	0.078834	0.398068
2018-05-08	3	125	6.7	20.1	9.53	26.4	11.66	0.7652		1.264	0.133647	0.987556	0.802535	1.561	0.047958	0.373724
2018-05-08	3	150	6.8	20	9.58	20	11.5	0.88	1.672	1.242	0.154991	1.03	0.808371	1.528	0.074107	0.430325
2018-05-08	S	#N/A	6.8	20	10.25	15	11.44	0.7536	1.701	1.196	0.127138	0.943049	0.788186	1.393	0.03194	0.372649
2018-05-22	1	50	6.9	20	9.47	26	12.99	1.113	2.232	1.003	0.216068	0.532434	0.691899	9.204	0.242305	0.406369
2018-05-22	1	100	7.3	19.9	10.06	24	14.28	1.008	1.823	1.43	0.214855	0.997149	0.856463	1.95	0.059712	0.352685
2018-05-22	1	125	7.3	19.9	9.91	26	21.12	2.235	1.753	1.339	0.211544	1.061	0.852196	1.743	0.049711	0.340676
2018-05-22	1	150	7.5	19.9	9.84	30	14.07	0.965	1.637	1.287	0.206963	1.018	0.845125	1.574	0.045912	0.341852
2018-05-22	2	50	7.4	19.9	9.62	26	13.53	0.9683	2.213	1.035	0.209123	0.422221	0.697062	9.131	0.188452	0.370047
2018-05-22	2	100	7.4	20	9.7	25.5	13.89	1.009	1.853	1.386	0.211362	0.961337	0.858816	2.039	0.062853	0.341542
2018-05-22	2	125	7.4	19.9	9.75	28	14.3	1.036	1.612	1.324	0.240167	0.981948	0.855338	1.702	0.070947	0.35851
2018-05-22	2	150	7.3	19.9	9.86	22	13.75	0.9755	1.582	1.264	0.208536	0.924236	0.84542	1.563	0.051292	0.349197
2018-05-22	3	50	7.4	20	9.86	27	13.77	0.9412	3.34	0.947894	0.210806	0.441317	0.699582	9.117	0.20708	0.381516
2018-05-22	3	100	7.3	20	9.88	26.8	14.05	0.9302	2.499	1.395	0.214461	1.027	0.83836	2.037	0.076024	0.350842
2018-05-22	3	125	7.3	19.9	9.79	29.4	13.88	0.9073	1.663	1.31	0.215192	0.967719	0.86008	1.473	0.060718	0.345993
2018-05-22	3	150	7.3	19.9	9.55	26	13.53	0.8989	1.578	1.268	0.20889	0.953859	0.842574	1.441	0.04121	0.342544
2018-05-22	S	#N/A	7.4	19.9	9.61	27	13.74	1.042	1.615	1.251	0.209893	0.955357	0.824538	1.517	0.056149	0.347303
2018-06-05	1	50	6.339	21.8	7.24	16	14.01	1.158	17.012
2018-06-05	1	100	6.408	21.5	8.01	23	12.08	1.3	1.444
2018-06-05	1	125	6.657	21.5	8.84	31	13.19	1.165	1.639
2018-06-05	1	150	6.688	21.4	8.9	15	13.1	1.151	1.566
2018-06-05	2	50	6.681	21.5	8.93	14	13.74	1.229	2.108
2018-06-05	2	100	6.626	21.4	8.86	14	12.89	0.9661	0.988
2018-06-05	2	125	6.662	21.3	8.86	9.2	13.88	1.024	2.178
2018-06-05	2	150	6.584	21.3	8.81	15	13.15	0.9267	2.033
2018-06-05	3	50	6.6	21.6	8.74	9.3	12.88	1.036	1.929
2018-06-05	3	100	6.581	21.6	8.57	11	13.01	1.156	1.794
2018-06-05	3	125	6.605	21.5	8.8	12	12.77	1.152	2.195
2018-06-05	3	150	6.575	21.4	8.89	9.11	13.1	1.007	2.326
2018-06-05	S	#N/A	6.581	21.4	8.89	9.6	12.99	0.9428	1.781
2018-06-19	1	50	6.833	20.9	9.36		16.94	1.631	12.32
2018-06-19	1	100	7.091	21	9.98		11.91	0.9455
2018-06-19	1	125	7.218	20.8	10.36		14.27	1.051	0.841
2018-06-19	1	150	7.263	20.7	10.68		16.35	1.091
2018-06-19	2	50	7.406	20.5	11		12.95	0.9391	14.186
2018-06-19	2	100	7.3825	20.7	10.86		12.88	0.7794
2018-06-19	2	125	7.359	20.5	10.74		14.43	1.075	1.259
2018-06-19	2	150	7.466	20.6	10.71		11.98	0.8107
2018-06-19	3	50	7.117	20.8			12.39	0.7804	10.633
2018-06-19	3	100	6.93	20.7	10.31		13.97	0.8886
2018-06-19	3	125	7.047	20.9	10.3		13.59	0.793	1.512
2018-06-19	3	150	7.241	20.8	10.55		12.11	0.9351
2018-06-19	S	#N/A	7.391	20.7	10.58		16.45	1.058	1.656
2018-07-03	1	50	8.92	20.5	10.87	56	14.06	1.043	1.387
2018-07-03	1	100	8.97	20.3	10.88	58	12.78	1.946	3.963
2018-07-03	1	125	8.94	20.3	10.68	54	16	1.203	1.247
2018-07-03	1	150	8.63	20.4	10.79	54	12.64	0.7969	1.45
2018-07-03	2	50	8.83	19.5	10.82	60	14.08	0.8455	2.577
2018-07-03	2	100	8.81	19.4	10.72	54	13.65	0.8333	1.528
2018-07-03	2	125	8.78	19.7	10.82	52	14	0.9538	1.614
2018-07-03	2	150	8.85	19.8	10.65	48	14.42	0.88	1.617
2018-07-03	3	50	9.02		10.69	44	13.14	0.9072	1.499
2018-07-03	3	100	9.05	19.6	10.71	48	13.58	0.8286	5.217
2018-07-03	3	125	9.05	19.8	10.78	60	13.34	0.8749	1.531
2018-07-03	3	150	8.88	19.6	10.69	38	13.49	39.22
2018-07-03	S	#N/A	8.86	19.7	10.69	40	13.91	4.332
2018-07-17	1	50	8.42	19.4	10.36	49.86	13.04	0.9298	7.163	1.01537	0.164063	0.778084	0.589934	10.467	0.171036	0.526142
2018-07-17	1	100	8.44	19.7	10.62	54.63	12.27	0.7596		1.40741	0.138255	1.23872	0.824268	2.05236	0.0156211	0.450518
2018-07-17	1	125	8.44	20	10.64	33.41	12.1	0.6134	6.297	0.813532	0.153706	0.495281	0.593893	4.94372	0.0232341	0.348942
2018-07-17	1	150	8.61	20.5	10.81	46.19	12.76	0.7183		1.27197	0.137921	0.935991	0.742735	1.84967	0.0173183	0.401466
2018-07-17	2	50	8.07	19.8	10.61	10.36	15.02	0.9551	7.61	1.26932	0.0927382	1.54769	0.708535	3.15601	0.0252138	0.374719
2018-07-17	2	100	8.37	20.1	10.69	27.41	12.67	0.6379		2.264	0.138044	1.39403	0.885334	11.723	0.165007	0.40203
2018-07-17	2	125	8.44	20.1	10.85	28.7	14.51	0.6318	1.591	0.975483	0.15227	0.323207	0.618452	4.92602	0.0480653	0.463007
2018-07-17	2	150	8.52	20.3	10.97	38.74	11.86	0.5857		0.911031	0.182776	0.253406	0.628517	5.0038	0.0554639	0.324772
2018-07-17	3	50	8.67	20.5	10.8	41.41	14.69	0.919	1.523	0.742471	0.175965	0.33915	0.480763	6.4992	0.0482989	0.497807
2018-07-17	3	100	8.69	20.6	10.84	58.27	12.04	0.6225		0.666317	0.170835	0.281067	0.473117	7.31444	0.0186638	0.463336
2018-07-17	3	125	8.74	20.6	10.83	26.81	14.87	0.9321	1.515	1.3419	0.116723	1.0507	0.727593	2.10837	0.0271973	0.375059
2018-07-17	3	150	8.952	20.2	10.88	27.85	12.29	0.6507		0.774441	0.162847	2.0868	0.523433	5.77831	0.0283857	0.480785
2018-07-17	S	#N/A	8.906	20.6	10.81	28.2	15.45	0.9981	1.843	1.37217	0.134012	1.57675	0.804757	2.32572	0.0135472	0.421814
2018-07-31	1	50	8.2	21.4	8.99		16.06	0.8427		1.28478	0.157926	1.48462	0.681413	11.4332	0.0235576	0.569207
2018-07-31	1	100	8.9	21.4	9.47		13.46	0.7315		1.51295	0.0577853	1.15396	0.837129	1.8947	0.00724312	0.260942
2018-07-31	1	125	8.57	21.7	9.51		13.02	0.7315		1.66038	0.047874	0.66219	0.757567	5.70098	0.0541988	0.484436
2018-07-31	1	150	8.6	21.5	9.61		12.83	0.6857		1.52257	0.0544275	1.25653	0.831319	2.75666	0.012206	0.326011
2018-07-31	2	50	7.537	21.3	9.3		13.97	0.8717
2018-07-31	2	100	7.8	21.3	9.2		14.01	0.9995		0.757802	0.0508039	0.944176	0.826428	7.72387	0.044569	0.480484
2018-07-31	2	125	8.04	21.3	9.47		12.82	0.876		1.40311	0.0601175	1.48653	0.929136	2.11631	0.014061	0.372499
2018-07-31	2	150	8.3	21.4	9.44		13.88	0.8474		1.57138	0.0540487	1.61207	0.942676	1.88524	0.0177504	0.325841
2018-07-31	3	50	8.1	21.3	9.38		13.86	0.7778		1.28068	0.0647661	0.667339	0.837084	7.61159	0.0354263	0.498297
2018-07-31	3	100	8.8	21.4	9.47		12.59	0.6218		1.38195	0.0585325	1.26407	0.889978	1.6646	0.0158644	0.25955
2018-07-31	3	125	8.2	21.4	9.4		13.22	0.7183		1.75871	0.0589726	1.36812	0.978086	2.23976	0.0207672	0.311784
2018-07-31	3	150	8.53	21.5	9.49		13.18	0.678		1.53979	0.046535	1.51541	0.946556	1.82838	0.0425831	0.390269
2018-07-31	S	#N/A	8.8	21.5	9.47		13.82	0.8577		1.5237	0.0492433	1.24098	0.903493	1.73746	0.00920454	0.333486
2018-08-14	1	50	7.75	19.7	9.97	35.45	12.13	0.8905		1.1996	0.0798558	0.64068	0.657707	10.0562	0.121189	0.37412
2018-08-14	1	100	8.06	20	10.05	30.88	12.7	0.9672		1.26594	0.0586562	0.915662	0.682166	2.05748	0.0240914	0.286099
2018-08-14	1	125	8.5	20	10.05	21.37	11.87	0.7991		1.22153	0.0595016	1.05661	0.701009	1.81883	0.0127078	0.294229
2018-08-14	1	150	8.48	20	10.05	26.8	11.58	0.7185		1.2306	0.0899026	1.04621	0.723891	1.69344	0.018683	0.345845
2018-08-14	2	50	7.68	19.7	9.73	42.8	11.86	0.6989		0.822833	0.0620558	0.390513	0.475989	9.71659	0.0148177	0.360508
2018-08-14	2	100	7.78	19.6	9.97	30.38	12.7	0.7709		1.32457	0.0636832	1.10175	0.711933	2.09028	0.00838646	0.322073
2018-08-14	2	125	8.26	20.3	10.19	30.4	11.97	0.6968		1.30241	0.0728666	1.13146	0.734046	1.82358	0.0143738	0.274903
2018-08-14	2	150	8.45	20.1	10.17	30.98	12.21	0.6504		1.24294	0.0602393	1.25978	0.731638	1.70958	0.0152354	0.280995
2018-08-14	3	50	7.34	19.5	9.61	40	13.11	1.056		0.803337	0.0579459	0.659097	0.490631	10.066	0.0129845	0.341048
2018-08-14	3	100	7.36	19.5	9.66	38.93	12.53	0.8638		1.36619	0.0613176	1.09746	0.697402	2.45594	0.0183422	0.376282
2018-08-14	3	125	7.66	19.6	9.8	41	12.35	0.7314		1.30482	0.0600628	1.10067	0.746681	1.66785	0.0160753	0.281326
2018-08-14	3	150	7.71	19.7	9.9	39.83	12.77	0.824		1.31121	0.0683761	1.15586	0.756584	1.83569	0.021136	0.298928
2018-08-14	S	#N/A	7.99	20	10.07	28.9	13.9	0.9134		1.28144	0.0568631	1.27449	0.749451	1.71727	0.0108425	0.368223
2018-08-29	1	50	6.35	20.2	7.4	40	16.86	0.8975	4.073	0.705921	0.0577711	0.432483	0.443127	9.88744	0.0182171	0.410015
2018-08-29	1	100	6.45	19.6	8.93	35	16.04	0.7074	2.329	1.13629	0.0588903	0.981641	0.637164	2.28309	0.0154992	0.30397
2018-08-29	1	125	6.5	19.3	9.37	38	15.7	0.689	2.606	1.17539	0.0586148	1.1242	0.665718	1.84961	0.0200165	0.338722
2018-08-29	1	150	6.5	19.3	9.13	35	14.91	0.7075	2.072	1.07754	0.0520363	1.0158	0.65906	1.57832	0.0145845	0.291488
2018-08-29	2	50	6.59	19.2	9.6	55	14.08	0.6419	1.827	0.650627	0.0570384	0.356846	0.426061	10.3134	0.0103666	0.426292
2018-08-29	2	100	6.6	19.1	9.54	33	15.23	0.6477		1.16083	0.0560441	1.01504	0.650184	2.01787	0.010678	0.34647
2018-08-29	2	125	6.6	19.2	9.41	34	15.63	0.7309	2.644	1.2072	0.0566674	1.01238	0.689243	1.84091	0.00741209	0.356559
2018-08-29	2	150	6.5	19.3	9.31	34	14.91	0.6444	2.178	1.04916	0.0529879	0.931872	0.636346	1.76536	0.0126251	0.385734
2018-08-29	3	50	6.66	19.3	9.64	34	16.45	0.7912	2.333	1.03042	0.0544712	1.05544	0.642184	1.65295	0.0125997	0.311077
2018-08-29	3	100	6.8	19.3	9.6	37	16.03	0.692	2.1	0.517356	0.0543276	0.247698	0.375284	9.86704	0.00832633	0.309112
2018-08-29	3	125	6.99	19.1	9.82	33	14.47	0.6667	1.892	1.07908	0.0510945	1.03154	0.622095	2.36163	0.00597255	0.359308
2018-08-29	3	150	7.88	19.1	10.2	27	14.47	0.587	1.919	1.15053	0.057188	1.08245	0.665545	1.78015	0.00521764	0.3948
2018-08-29	S	#N/A	6.9	19.2	9.58	33	15.39	0.7051	1.788	1.09179	0.0540268	1.05465	0.653146	1.63086	0.0170633	0.330188
2018-09-25	1	50	7.23	20	10.96	170	16.64	1.143	18.131	0.879217	0.106576	0.463246	0.552439	4.50346	0.0188385	0.357219
2018-09-25	1	100	7.03	19.9	10.96	23	12.23	0.9135		1.36522	0.109184	1.09904	0.731094	1.77688	0.0220415	0.391918
2018-09-25	1	125	6.92	19.7	11.08	24	12.98	1.041	2.048	1.28907	0.117119	1.17613	0.735192	1.75295	0.0143887	0.363214
2018-09-25	1	150	6.92	19.6	10.98	29	12.43	0.7935		1.24551	0.0963151	1.0339	0.730187	1.98703	0.0154311	0.353629
2018-09-25	2	50	6.83	19.6	10.9	28	17.69	1.182	1.608	1.21151	0.102082	1.11169	0.726875	1.61712	0.0137994	0.259393
2018-09-25	2	100	6.51	19.5	11.14	27	14.09	1		0.74056	0.10644	0.328109	0.471774	5.99864	0.0191562	0.371973
2018-09-25	2	125	6.54	19.7	11.19	27	13.61	0.9052	1.689	1.32795	0.107404	1.09597	0.738653	1.81122	0.00692112	0.325448
2018-09-25	2	150	6.53	19.6	11.27	19	14.01	0.9359		1.25591	0.109052	1.04802	0.719857	1.65469	0.0171917	0.217199
2018-09-25	3	50	6.69	19.8	10.23	26	16.17	1.063	4.595	1.21747	0.100476	1.05551	0.726554	1.96641	0.0145313	0.324804
2018-09-25	3	100	6.5	20	10.5	23	13.25	1.022		0.907543	0.111215	0.624176	0.598889	4.14223	-0.011223	0.399306
2018-09-25	3	125	6.45	19.9	10.65	23	12.22	0.8062	1.575	1.29365	0.111567	0.995175	0.71621	1.96912	0.0116528	0.296807
2018-09-25	3	150	6.26	19.6	11.15	19	12.96	0.9535		1.28127	0.110968	1.12161	0.718111	1.83961	0.0104484	0.326684
2018-09-25	S	#N/A	6.33	19.5	11.3	22	12.74	0.8798	1.497	1.21397	0.106203	1.0797	0.71246	1.63846	0.0176516	0.363361
2018-10-09	1	50	6.31	20.7	9.66	27.4	16.74	1.269		1.28595	0.116565	1.06139	0.744395	1.76118	0.025187	0.33946
2018-10-09	1	100	6.38	20.7	9.93	32.4	13	1.419	2.949	1.3844	0.115219	1.23153	0.779001	1.77374	0.0162947	0.416603
2018-10-09	1	125	6.38	20.7	10.08	23.8	12.71	0.9878	2.111	1.31377	0.123119	1.06201	0.748226	2.02916	0.0114127	0.31912
2018-10-09	1	150	6.36	20.7	10.05	34.6	12.78	0.9483	2.152	0.791852	0.128708	0.403059	0.533937	9.53437	0.0235802	0.414834
2018-10-09	2	50	6.35	20.7	9.66	30	13.7	0.9123	2.091	1.35572	0.123389	1.20208	0.748047	2.13761	0.0128661	0.456002
2018-10-09	2	100	6.31	20.6	9.76	25.8	13.07	0.913	2.475	0.831635	0.127357	0.446933	0.542456	9.77106	0.0174494	0.400727
2018-10-09	2	125	6.38	20.6	9.82	34	13.71	0.9464	1.994	1.34478	0.115629	1.20493	0.766602	1.70298	0.0151175	0.39759
2018-10-09	2	150	6.34	20.7	9.57	26.3	13.59	0.9466	2.174	1.34994	0.132161	1.08624	0.742895	2.09854	0.027683	0.432933
2018-10-09	3	50	6.18	20.9	8.4	33.5	17.5	1.575	2.197	0.809523	0.129546	0.601528	0.537803	10.2005	0.017752	0.434965
2018-10-09	3	100	6.16	20.9	8.35	34.6	14.23	1.114	2.027	1.34896	0.115026	1.27404	0.789497	1.72561	0.0177482	0.28239
2018-10-09	3	125	6.17	20.9	8.4	35.2	14.25	1.067	1.518	1.3886	0.128861	1.29829	0.803657	1.86619	0.0123309	0.406271
2018-10-09	3	150	6.23	20.7	9.15	32.6	13.3	1.379	2.433	1.32757	0.133843	1.15608	0.747096	2.29432	0.0191134	0.411292
2018-10-09	S	#N/A	6.29	20.6	9.41	37.6	13.49	1.193		0.882099	0.129317	0.858977	0.568345	11.0601	0.0196984	0.399433
2018-10-23	1	50	5.6	21.3	9.93	45	16.14	1.144	5.515	1.17026	0.169037	0.630163	0.736604	4.13353	0.0418388	0.34432
2018-10-23	1	100	5.38	21.3	9.96	50	13.29	0.9931	2.853	1.47505	0.167749	1.11316	0.849851	1.8599	0.026398	0.34885
2018-10-23	1	125	5.92	21.3	9.99	43	13.25	1.015	2.26	1.46598	0.162668	1.14213	0.866366	1.69617	0.00807557	0.33044
2018-10-23	1	150	5.82	21.3	9.69	52	13.85	1.04		1.37147	0.158816	1.15074	0.856398	1.58852	0.0272766	0.41289
2018-10-23	2	50	6.46	21.5	9.33	52	13.51	1.03	1.886	1.16526	0.173587	0.697884	0.659366	5.01434	0.0451682	0.333118
2018-10-23	2	100	5.69	21.4	9.63	40.52	13.03	0.9357	2.366	1.4864	0.18295	1.1653	0.841576	2.35368	0.0259618	0.43122
2018-10-23	2	125	5.74	21.4	9.76	42.01	12.94	1.122	2.183	1.40979	0.160054	1.13845	0.852946	1.92112	0.0119584	0.353344
2018-10-23	2	150	6.45	21.3	9.69	38.9	16.26	1.062	-0.213	1.43942	0.158327	1.1693	0.853444	4.79851	0.0222217	0.686832
2018-10-23	3	50	5.52	21.3	9.21	41	13.42	0.9124	3.415	1.20663	0.171107	0.597214	0.77546	3.6328	0.0332707	0.47371
2018-10-23	3	100	5.52	21.3	9.38	43	13.2	0.9931	2.392	1.45059	0.166885	1.22043	0.843207	2.21764	0.0141465	0.426694
2018-10-23	3	125	5.5	21.3	9.38	43	12.99	0.8852	2.442	1.01421	0.168147	0.512754	0.6816	4.2977	0.0313633	0.309255
2018-10-23	3	150	5.65	21.3	9.64	43	12.97	0.8847	2.034	1.41839	0.166792	1.11871	0.833946	2.04984	0.0325355	0.403463
2018-10-23	S	#N/A	5.53	21.3	9.65	44	12.7	0.8696	3.899	1.47889	0.165212	1.21525	0.848615	1.83786	0.0305062	0.353584
2018-11-20	1	50	6.88	22.8	8.62	3.59	17.65	1.206		1.07957	0.167988	0.474014	0.721054	6.16772	0.0227427	0.49501
2018-11-20	1	100	6.67	22.8	8.92	4.57	13.21	0.9863		1.3922	0.169867	1.14722	0.873264	1.87773	0.0259363	0.43054
2018-11-20	1	125	6.51	22.7	9.13	4.88	14.28	1.026		1.43899	0.166106	1.21952	0.879688	1.73056	0.0164353	0.390251
2018-11-20	1	150	6.41	22.8	9.05	4.8	13.26	0.9708		1.45168	0.16399	1.16551	0.885053	1.58289	0.0390194	0.340141
2018-11-20	2	50	6.31	22.8	8.45	4.37	13.54	0.9619	1.61	1.48906	0.15933	1.25756	0.881032	1.52364	0.0408769	0.453569
2018-11-20	2	100	6.21	22.8	8.84	4.66	12.76	0.8875	1.523	1.49637	0.158974	1.24575	0.883089	1.58238	0.0431036	0.404792
2018-11-20	2	125	6.24	22.5	9.07	4.32	12.99	0.97	1.557	1.35302	0.159305	1.18247	0.867358	1.47681	0.0350829	0.371354
2018-11-20	2	150	6.24	22.7	9.12	4.39	12.84	0.8813	18.103	1.00525	0.173566	0.460175	0.681419	9.81554	0.0478233	0.419725
2018-11-20	3	50	6.27	22.8	8.57	4.42	17.05	1.052	5.229	1.3874	0.170267	1.21848	0.865315	2.03497	0.0284881	0.369218
2018-11-20	3	100	6.21	22.8	9.15	4.21	13.44	0.9115		1.43257	0.192318	1.26689	0.875947	1.74485	0.024573	0.412206
2018-11-20	3	125	6.22	22.8	9.33	4.84	13.42	0.9924		1.4489	0.160495	1.21962	0.881921	1.61516	0.0218167	0.401578
2018-11-20	3	150	6.2	22.7	9.14	4.93	13.39	0.9063		1.45733	0.16114	1.16763	0.878863	1.58857	0.0308693	0.4444
2018-11-20	S	#N/A	6.23	22.7	9.26	4.86	12.63	0.9117		1.44825	0.153349	1.23683	0.887565	1.59389	0.0277287	0.472591
		MW	6.84283	19.3478	9.67272	27.667	13.7424	0.961191	2.86091	1.16535	0.111564	0.773213	0.716751	4.00554	0.0645344	0.41096
		SD	0.835712	1.71797	0.914905	18.656	2.30428	1.88999	3.4353	0.270165	0.0561443	0.421602	0.133107	5.01226	0.0619761	0.134933
			398	387	397	163	419	419	361	379	378	379	379	379	329	379

## Sheet: temperature
Sediment temperature
	S 10 cm	PP1 10 cm	PP2 10 cm	PP3 10 cm
Min	0.024	12.92	16.034	9.558
Max	22.106	23.16	21.724	24.243
water temperature
	air	1 cm	11 cm	21 cm	31 cm	41 cm	51 cm	61 cm	71 cm	81 cm	91 cm	101 cm
MAX	36.471	31.996	32.021	31.689	30.318	28.965	28.543	28.518	27.579	29.665	26.867	26.646
3155	Manderscheid-Sonnenhof		1981-2010
ftp://ftp-cdc.dwd.de/pub/CDC/observations_germany/climate/multi_annual/mean_81-10/
			Jan	Feb	Mrz	Apr	Mai	Jun	Jul	Aug	Sep	Okt	Nov	Dez	annual
		Temp	0.4	0.6	4.2	7.6	12	15	17.2	16.5	12.7	8.6	4	1.2	8.3
		Precip	101	71	82	60	72	68	67	65	77	83	78	106	931
Temperatures on samling dates			(Eddy Hobo S)
12 p.m.
	air	water	sediment
16.3.	7.67	5.64	5.21
11.4.	13.81	15.08	10.08
9.5.	23.91	23.95	13.76

## Sheet: correlations
	CH4 production		CO2 production		Q10 (CH4)		acetoclastic methanog.		EDC		EAC(OM)		CH4 flux		CO2 flux
	p	rho	p	rho	p	rho	p	rho	p	rho	p	rho	p	rho	p	rho
aromatics	0.0008962	-0.669114	0.001681	-0.640881	0.03413	-0.821429							0.1323	-0.595238	0.1966	-0.52381
fats, waxes, lipids	0.0004183	-0.699605	0.0001454	-0.735742	0.03413	-0.821429			0.001138	0.565145			0.01538	-0.833333	0.4279	-0.333333
humic acids	0.002666	-0.618295	0.001285	-0.653303	0.03413	-0.821429							0.01538	-0.833333	0.3894	-0.357143
lignin	0.00277	-0.606451	0.002577	-0.60996	0.03413	-0.821429							0.02063	-0.786387	0.3524	-0.38051
phenols	0.003388	-0.605872	0.0009448	-0.666855	0.03413	-0.821429							0.01538	-0.833333	0.3894	-0.357143
C	0.1941	-0.287408	0.327	-0.218521									0.05759	-0.714286	0.6646	-0.190476
C/N	0.3558	-0.206098	0.3777	-0.197064			0.01323	0.447155					0.007242	-0.880952	0.4279	-0.333333
H2 concentration	0.0001514	0.44977	9.834e-06	0.514649							0.1572	-0.28547
acetate concentration	0.4916	0.248485	0.1909	0.454545							0.002232	-0.387335
hydrogenotrophic											0.0309	0.426325
acetoclastic											0.7481	0.0422339
EAC(OM)	0.9457	0.030303	0.4697	-0.260606
EAC(inorg)	0.2042	-0.442424	1	0.00606061
EAC(tot)	0.1909	-0.454545	0.4697	-0.260606
EDC	0.03114	-0.69697	0.03938	-0.672727
EAC/EDC	0.2474	0.406061	0.407	0.29697
EEC	0.1661	-0.478788	0.05445	-0.636364
S (%)	0.01928	-0.576975	0.08698	-0.441393
clay													0.02275	0.64775	0.03731	0.604567
silt													0.1005	0.496609	0.3396	0.302283
sand													0.02275	-0.64775	0.03731	-0.604567
CH4 stock change													0.1631	-0.221971	0.7135	-0.0641457
CO2 stock change													0.7623	-0.0487253	0.7755	0.0498599
